# Supplementary material for: Diels–Alder adducts of a labdane diterpenoid from the Chinese liverwort Pallavicinia subciliata
Source: Royal Society of Chemistry journal article supplement (doi:10.1039/d1qo01891d), 2022-01-01
Supplement: d1qo01891d1.pdf [file d1qo01891d1.pdf]

## *Supporting Information*

### **Diels-Alder Adducts of a Labdane Diterpenoid from the Chinese Liverwort *Pallavicinia subciliata*.**

Shu-Gong Liu,<sup>a</sup> Chun-Yang Zhang,<sup>a</sup> Jin-Chuan Zhou,<sup>b</sup> Jing-Jing Han,<sup>a</sup> Ming-Zhu Zhu,<sup>a</sup> Jiao-Zhen Zhang,<sup>a</sup> Yi Li,<sup>a</sup> Z.J. Xu,<sup>a</sup> Hui Meng,<sup>a</sup> Xue Wang,<sup>a</sup> Yan Zong,<sup>a</sup> Shuang-Zhi Yuan,<sup>a</sup> Ya-Nan Qiao,<sup>a</sup> Ya-Jie Tang,<sup>c</sup> and Hong-Xiang Lou<sup>a,\*</sup>

<sup>a</sup> *Key Laboratory of Chemical Biology (Ministry of Education), School of Pharmacy, Shandong University, 44 West Wenhua Road, Jinan, Shandong 250012, P.R. China.*

<sup>b</sup> *School of Pharmacy, Linyi University, Linyi 276000, P. R. China*

<sup>c</sup> *State Key Laboratory of Microbial Technology, Shandong University, Qingdao 266237, P. R. China*

Corresponding Author

\* Email: louhongxiang@sdu.edu.cn

## **List of Supporting Information**

### **Experimental Section**

Anti-inflammatory activity assay

**HRESIMS, IR, UV, ECD, 1D and 2D NMR spectra for compounds 1–4**

Figures S1-1–S4-11

Figures S5–S8

## Anti-inflammatory activity assay:

Inhibitory effects of compounds **1–4** against NO production in RAW 264.7 cells. Cells were treated with indicated concentrations of ingredients along with LPS (1  $\mu\text{g}/\text{mL}$ ) for 24 h, and then the accumulation of nitrite from the supernatants was evaluated by Griess reagent. Didox was used as a positive control.

| NO | 1     | 2     | 3     | 4     | 5     | 6     | 7     | 8     | 9     | 10    | 11    | 12    |
|----|-------|-------|-------|-------|-------|-------|-------|-------|-------|-------|-------|-------|
| A  | 0.069 | 0.059 | 0.091 | 0.091 | 0.089 | 0.072 | 0.048 | 0.047 | 0.048 | 0.046 | 0.047 | 0.045 |
| B  | 0.054 | 0.049 | 0.087 | 0.088 | 0.063 | 0.064 | 0.085 | 0.083 | 0.078 | 0.072 | 0.063 | 0.064 |
| C  | 0.088 | 0.89  | 0.092 | 0.094 | 0.078 | 0.072 | 0.079 | 0.076 | 0.071 | 0.064 | 0.06  | 0.059 |
| D  | 0.089 | 0.084 | 0.089 | 0.082 | 0.081 | 0.073 | 0.085 | 0.081 | 0.086 | 0.078 | 0.075 | 0.074 |
| E  | 0.084 | 0.081 | 0.081 | 0.071 | 0.057 | 0.054 | 0.084 | 0.085 | 0.081 | 0.070 | 0.067 | 0.068 |
| F  | 0.080 | 0.080 | 0.074 | 0.065 | 0.056 | 0.051 | 0.045 | 0.044 | 0.042 | 0.042 | 0.043 | 0.048 |
| G  | 0.080 | 0.072 | 0.065 | 0.055 | 0.057 | 0.054 | 0.047 | 0.047 | 0.047 | 0.048 | 0.049 | 0.056 |
| H  | 0.081 | 0.068 | 0.067 | 0.062 | 0.064 | 0.061 | 0.055 | 0.066 | 0.091 | 0.135 | 0.224 | 0.391 |

| MTT | 1     | 2     | 3     | 4     | 5     | 6     | 7     |
|-----|-------|-------|-------|-------|-------|-------|-------|
| A   | 2.548 | 2.447 | 2.417 | 2.367 | 1.723 | 1.642 | 0.055 |
| B   | 2.814 | 2.651 | 2.355 | 2.136 | 1.91  | 1.918 | 2.027 |
| C   | 2.587 | 2.456 | 2.293 | 2.744 | 2.189 | 2.591 | 2.308 |
| D   | 2.699 | 2.364 | 2.042 | 2.36  | 2.024 | 2.259 | 2.825 |
| E   | 2.534 | 2.315 | 2.065 | 2.889 | 3.104 | 0.752 | 2.372 |
| F   | 2.618 | 1.966 | 2.321 | 2.616 | 2.765 | 0.662 | 1.926 |
| G   | 2.064 | 1.932 | 2.051 | 2.358 | 2.375 | 2.02  | 1.134 |
| H   | 2.698 | 2.121 | 1.747 | 2.215 | 2.017 | 2.094 | 0.049 |

| NaNO <sub>2</sub> Concentration-X | 1.5625 | 3.125 | 6.25  | 12.5  | 25    | 50    |
|-----------------------------------|--------|-------|-------|-------|-------|-------|
| Absorbance Value                  | 0.055  | 0.066 | 0.091 | 0.135 | 0.224 | 0.391 |
| Positive Absorbance-Y             | 0.007  | 0.018 | 0.043 | 0.087 | 0.176 | 0.343 |

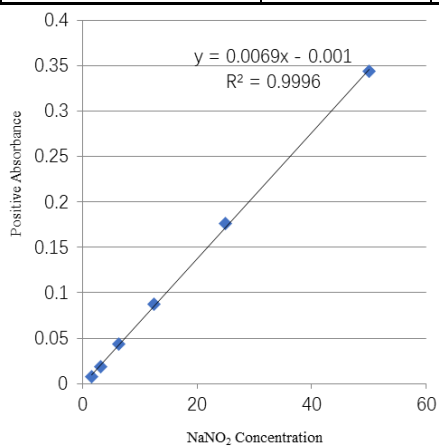

# Compound 1

| NO( $\mu$ M)               | DiDOX100 | C     | LPS   | 3.125 | 6.25  | 12.5  | 25    | 50    | 100   |
|----------------------------|----------|-------|-------|-------|-------|-------|-------|-------|-------|
| Absorbance Value           | 0.063    | 0.054 | 0.091 | 0.088 | 0.089 | 0.092 | 0.094 | 0.078 | 0.072 |
|                            | 0.064    | 0.049 | 0.091 | 0.089 | 0.084 | 0.089 | 0.082 | 0.081 | 0.073 |
| Corrected Absorbance       | 0.015    | 0.006 | 0.043 | 0.040 | 0.041 | 0.044 | 0.046 | 0.030 | 0.024 |
|                            | 0.016    | 0.001 | 0.043 | 0.041 | 0.036 | 0.041 | 0.034 | 0.033 | 0.025 |
| Standard Curve Calculation | 2.391    | 1.086 | 6.449 | 6.014 | 6.159 | 6.594 | 6.884 | 4.565 | 3.695 |
|                            | 2.536    | 0.362 | 6.449 | 6.159 | 5.434 | 6.159 | 5.144 | 5.000 | 3.840 |
| AVG                        | 2.463    | 0.724 | 6.449 | 6.086 | 5.797 | 6.376 | 6.014 | 4.782 | 3.768 |
| SD                         | 0.102    | 0.512 | 0     | 0.102 | 0.512 | 0.307 | 1.229 | 0.307 | 0.102 |

| MTT                                      | DiDOX100 | C       | LPS    | 3.125   | 6.25   | 12.5   | 25      | 50     | 100     |
|------------------------------------------|----------|---------|--------|---------|--------|--------|---------|--------|---------|
| Absorbance Value                         | 1.91     | 2.548   | 2.355  | 2.587   | 2.456  | 2.293  | 2.744   | 2.189  | 2.591   |
|                                          | 1.918    | 2.447   | 2.367  | 2.699   | 2.364  | 2.042  | 2.360   | 2.024  | 2.259   |
| AVG                                      | 1.914    | 2.497   | 2.361  | 2.643   | 2.410  | 2.167  | 2.552   | 2.1065 | 2.425   |
| (The original value/AVG of group C) *100 | 76.476   | 102.022 | 94.294 | 103.583 | 98.338 | 91.811 | 109.869 | 87.647 | 103.743 |
|                                          | 76.796   | 97.977  | 94.774 | 108.068 | 94.654 | 81.761 | 94.494  | 81.041 | 90.450  |
| AVG                                      | 76.636   | 100.000 | 94.534 | 105.825 | 96.496 | 86.786 | 102.182 | 84.344 | 97.097  |
| SD                                       | 0.226    | 2.859   | 0.339  | 3.171   | 2.604  | 7.106  | 10.872  | 4.671  | 9.399   |

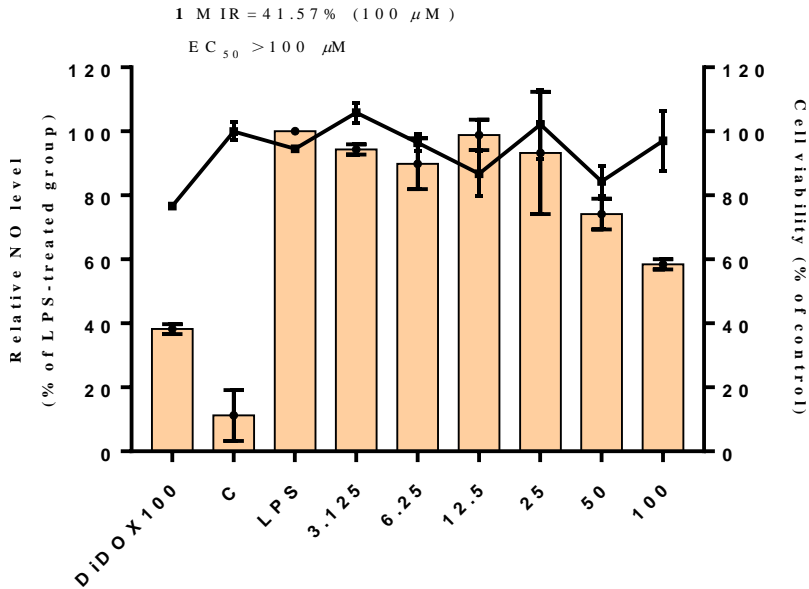

## Compound 2

| NO( $\mu$ M)               | DiDOX100 | C     | LPS   | 3.125 | 6.25   | 12.5  | 25     | 50    | 100   |
|----------------------------|----------|-------|-------|-------|--------|-------|--------|-------|-------|
| Absorbance Value           | 0.063    | 0.054 | 0.091 | 0.088 | 0.089  | 0.092 | 0.094  | 0.078 | 0.072 |
|                            | 0.064    | 0.049 | 0.091 | 0.089 | 0.084  | 0.089 | 0.082  | 0.081 | 0.073 |
| Corrected Absorbance       | 0.015    | 0.006 | 0.043 | 0.040 | 0.0415 | 0.044 | 0.0465 | 0.030 | 0.024 |
|                            | 0.016    | 0.001 | 0.043 | 0.041 | 0.036  | 0.041 | 0.0345 | 0.033 | 0.025 |
| Standard Curve Calculation | 2.391    | 1.086 | 6.449 | 6.014 | 6.159  | 6.594 | 6.884  | 4.565 | 3.695 |
|                            | 2.536    | 0.362 | 6.449 | 6.159 | 5.434  | 6.159 | 5.145  | 5.000 | 3.840 |
| AVG                        | 2.463    | 0.724 | 6.449 | 6.086 | 5.797  | 6.376 | 6.014  | 4.782 | 3.768 |
| SD                         | 0.102    | 0.512 | 0     | 0.102 | 0.512  | 0.307 | 1.229  | 0.307 | 0.102 |

| MTT                                      | DiDOX100 | C       | LPS    | 3.125   | 6.25   | 12.5   | 25     | 50     | 100    |
|------------------------------------------|----------|---------|--------|---------|--------|--------|--------|--------|--------|
| Absorbance Value                         | 1.910    | 2.548   | 2.355  | 2.064   | 1.932  | 2.051  | 2.358  | 2.375  | 2.020  |
|                                          | 1.918    | 2.447   | 2.367  | 2.698   | 2.121  | 1.747  | 2.215  | 2.017  | 2.094  |
| AVG                                      | 1.914    | 2.497   | 2.361  | 2.381   | 2.026  | 1.899  | 2.286  | 2.196  | 2.057  |
| (The original value/AVG of group C) *100 | 76.476   | 102.022 | 94.294 | 82.642  | 77.357 | 82.122 | 94.414 | 95.095 | 80.880 |
|                                          | 76.796   | 97.977  | 94.774 | 108.028 | 84.924 | 69.949 | 88.688 | 80.760 | 83.843 |
| AVG                                      | 76.636   | 100.000 | 94.534 | 95.335  | 81.141 | 76.036 | 91.551 | 87.927 | 82.362 |
| SD                                       | 0.226    | 2.859   | 0.339  | 17.950  | 5.351  | 8.607  | 4.048  | 10.135 | 2.095  |

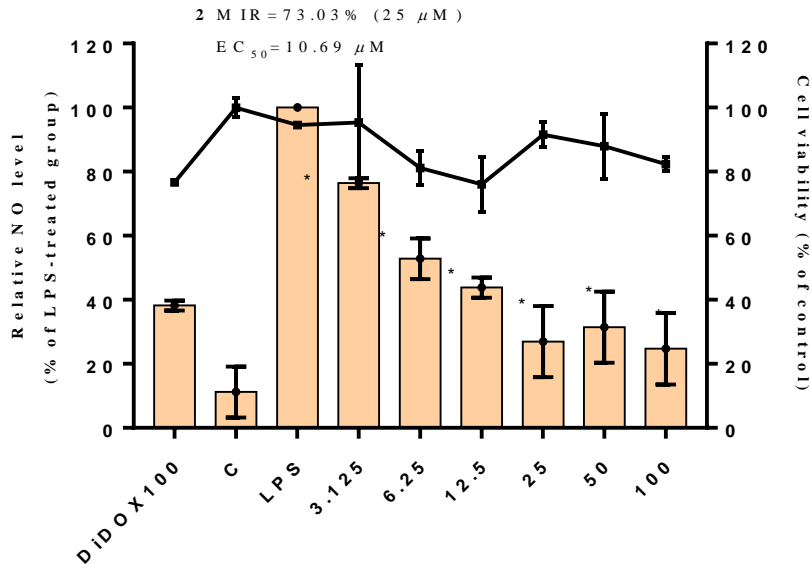

### Compound 3

| XJ                         |          |       |       |       |       |        |        |        |         |
|----------------------------|----------|-------|-------|-------|-------|--------|--------|--------|---------|
| NO( $\mu\text{M}$ )        | DiDOX100 | C     | LPS   | 3.125 | 6.250 | 12.500 | 25.000 | 50.000 | 100.000 |
| Absorbance Value           | 0.063    | 0.054 | 0.091 | 0.084 | 0.081 | 0.081  | 0.071  | 0.057  | 0.054   |
|                            | 0.064    | 0.049 | 0.091 | 0.080 | 0.080 | 0.074  | 0.065  | 0.056  | 0.051   |
| Corrected Absorbance       | 0.015    | 0.006 | 0.043 | 0.036 | 0.033 | 0.033  | 0.023  | 0.009  | 0.006   |
|                            | 0.016    | 0.001 | 0.043 | 0.032 | 0.032 | 0.026  | 0.017  | 0.008  | 0.003   |
| Standard Curve Calculation | 2.391    | 1.086 | 6.449 | 5.434 | 5.000 | 5.000  | 3.551  | 1.522  | 1.087   |
|                            | 2.536    | 0.362 | 6.449 | 4.855 | 4.855 | 3.985  | 2.681  | 1.377  | 0.652   |
| AVG                        | 2.463    | 0.724 | 6.449 | 5.144 | 4.927 | 4.492  | 3.116  | 1.449  | 0.869   |
| SD                         | 0.102    | 0.512 | 0     | 0.409 | 0.102 | 0.717  | 0.615  | 0.102  | 0.307   |

| MTT                                      | DiDOX100 | C       | LPS    | 3.125   | 6.25   | 12.5   | 25      | 50      | 100    |
|------------------------------------------|----------|---------|--------|---------|--------|--------|---------|---------|--------|
| Absorbance Value                         | 1.910    | 2.548   | 2.355  | 2.534   | 2.315  | 2.065  | 2.889   | 3.104   | 0.752  |
|                                          | 1.918    | 2.447   | 2.367  | 2.618   | 1.966  | 2.321  | 2.616   | 2.765   | 0.662  |
| AVG                                      | 1.914    | 2.497   | 2.361  | 2.576   | 2.140  | 2.193  | 2.7525  | 2.9345  | 0.707  |
| (The original value/AVG of group C) *100 | 76.476   | 102.022 | 94.294 | 101.461 | 92.692 | 82.682 | 115.675 | 124.284 | 30.110 |
|                                          | 76.796   | 97.977  | 94.774 | 104.828 | 78.718 | 92.932 | 104.744 | 110.710 | 26.506 |
| AVG                                      | 76.636   | 100.000 | 94.534 | 103.143 | 85.705 | 87.807 | 110.210 | 117.497 | 28.308 |
| SD                                       | 0.226    | 2.859   | 0.339  | 2.378   | 9.881  | 7.248  | 7.729   | 9.597   | 2.548  |

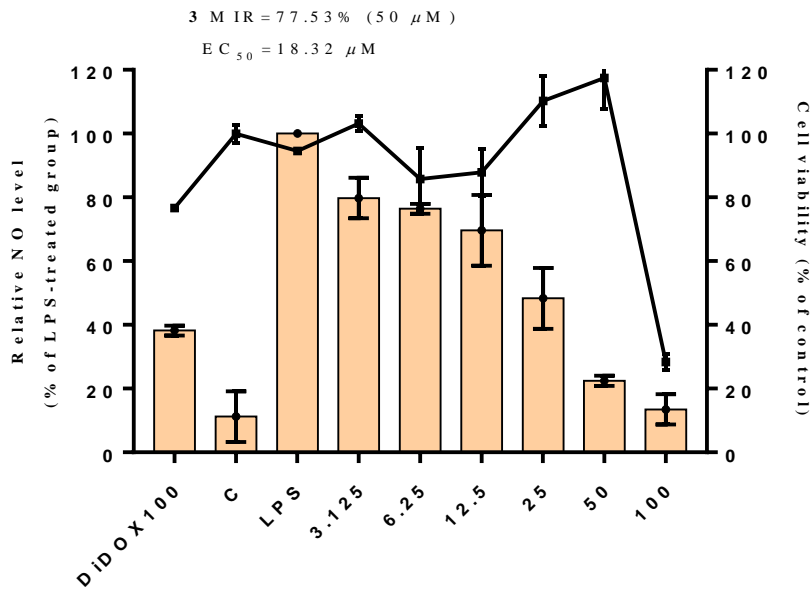

## Compound 4

| NO( $\mu$ M)               | DiDOX100 | C     | LPS   | 3.125 | 6.25  | 12.5  | 25    | 50    | 100   |
|----------------------------|----------|-------|-------|-------|-------|-------|-------|-------|-------|
| Absorbance Value           | 0.063    | 0.054 | 0.091 | 0.085 | 0.083 | 0.078 | 0.072 | 0.063 | 0.064 |
|                            | 0.064    | 0.049 | 0.091 | 0.079 | 0.076 | 0.071 | 0.064 | 0.06  | 0.059 |
| Corrected Absorbance       | 0.015    | 0.006 | 0.043 | 0.037 | 0.035 | 0.030 | 0.024 | 0.015 | 0.016 |
|                            | 0.016    | 0.001 | 0.043 | 0.031 | 0.028 | 0.023 | 0.016 | 0.012 | 0.012 |
| Standard Curve Calculation | 2.391    | 1.086 | 6.449 | 5.579 | 5.289 | 4.565 | 3.695 | 2.391 | 2.536 |
|                            | 2.536    | 0.362 | 6.449 | 4.710 | 4.275 | 3.550 | 2.536 | 1.956 | 1.811 |
| AVG                        | 2.463    | 0.724 | 6.449 | 5.144 | 4.782 | 4.057 | 3.116 | 2.174 | 2.173 |
| SD                         | 0.102    | 0.512 | 0     | 0.614 | 0.717 | 0.717 | 0.819 | 0.307 | 0.512 |

| MTT                                      | DiDOX100 | C       | LPS    | 3.125  | 6.25   | 12.5   | 25     | 50     | 100     |
|------------------------------------------|----------|---------|--------|--------|--------|--------|--------|--------|---------|
| Absorbance Value                         | 1.910    | 2.548   | 2.355  | 2.027  | 1.750  | 1.770  | 1.622  | 1.921  | 2.855   |
|                                          | 1.918    | 2.447   | 2.367  | 2.308  | 2.314  | 2.295  | 2.017  | 2.153  | 2.993   |
| AVG                                      | 1.914    | 2.497   | 2.361  | 2.167  | 2.032  | 2.032  | 1.819  | 2.037  | 2.924   |
| (The original value/AVG of group C) *100 | 76.476   | 102.022 | 94.294 | 81.161 | 70.070 | 70.870 | 64.944 | 76.916 | 114.314 |
|                                          | 76.796   | 97.977  | 94.774 | 92.412 | 92.652 | 91.891 | 80.760 | 86.206 | 119.839 |
| AVG                                      | 76.636   | 100     | 94.534 | 86.786 | 81.361 | 81.381 | 72.852 | 81.561 | 117.077 |
| SD                                       | 0.226    | 2.859   | 0.339  | 7.955  | 15.968 | 14.864 | 11.183 | 6.568  | 3.907   |

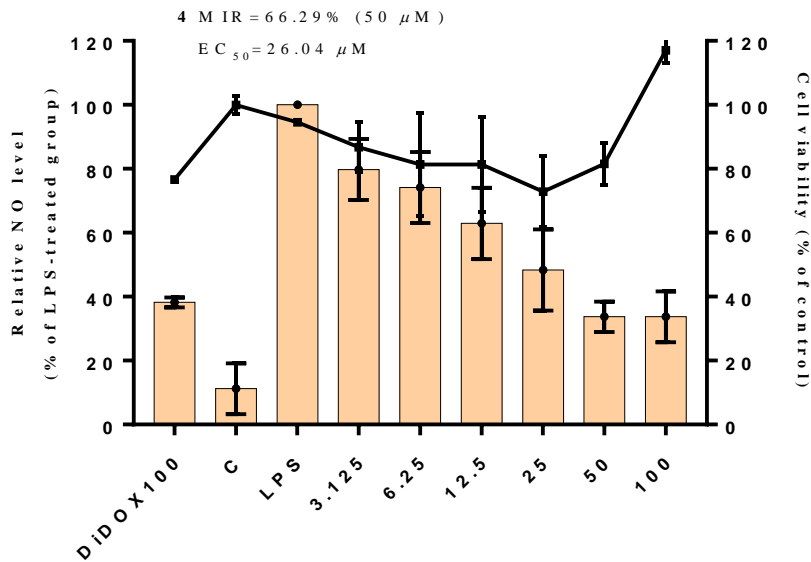

Inhibition of NO production in LPS-stimulated RAW 264.7 murine macrophages was used to evaluate the anti-inflammatory activity of compounds **1-4**. Compound concentrations of 100, 50, 25, 12.5, and 6.25  $\mu\text{M}$  were tested in the assay simultaneously, respectively. Didox, a known inhibitor of LPS-induced NO production, exhibits approximately 60% inhibition in this assay at a concentration of 100  $\mu\text{M}$  and was used as a positive control. To evaluate the anti-inflammatory properties of the compounds, the maximum inhibition rate (MIR) of NO production using nontoxic compound concentrations was calculated by comparing the decrease in the concentration of NO in the presence of the compounds compared to the NO concentration in the LPS-stimulated alone group. The inhibitory potency of the compounds was categorized according to the following criteria: strong ( $\text{MIR} \geq 80\%$ ); moderate ( $80\% > \text{MIR} \geq 50\%$ ); weak ( $50\% > \text{MIR} \geq 30\%$ ); undetected ( $\text{MIR} < 30\%$ ). The MIRs of dimers **2-4** were 73.03% (25  $\mu\text{M}$ ), 77.53% (50  $\mu\text{M}$ ), and 66.29% (50  $\mu\text{M}$ ), respectively, while that of monomeric **1** was 41.57% (100  $\mu\text{M}$ ). In summary, the anti-inflammatory bioassays showed that dimeric compounds **2-4** are better than monomeric **1**.



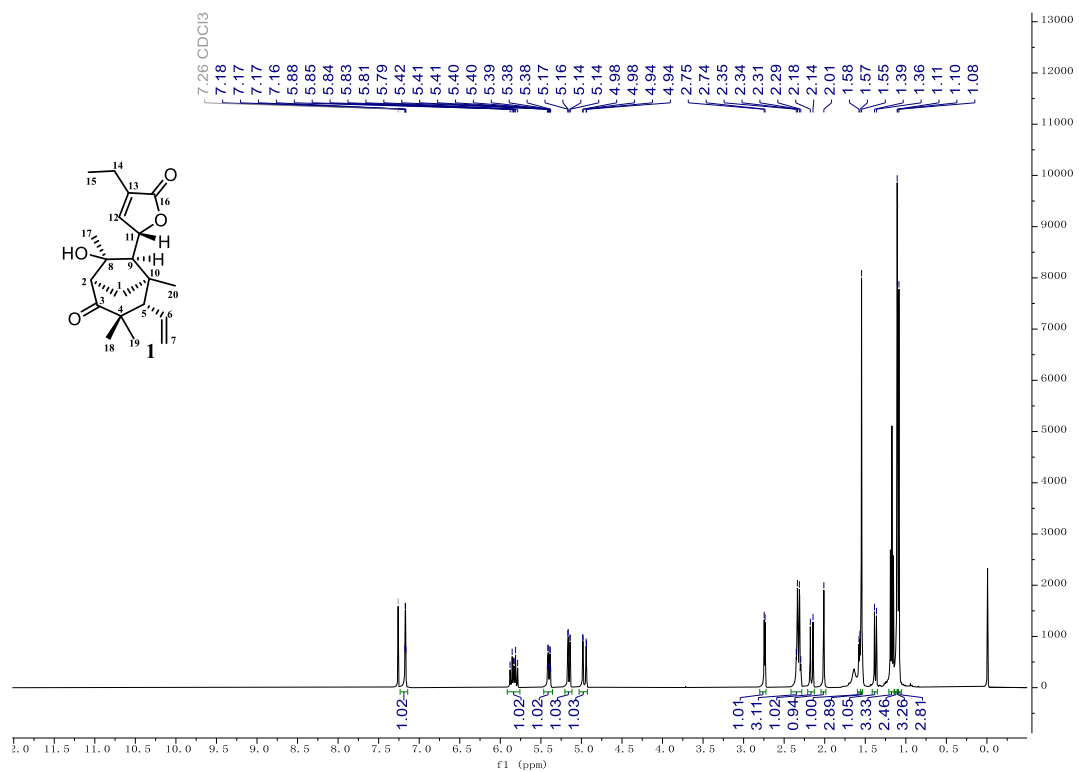

Figure S1-1. <sup>1</sup>H NMR spectrum (400 MHz) of 1 in CDCl<sub>3</sub>.

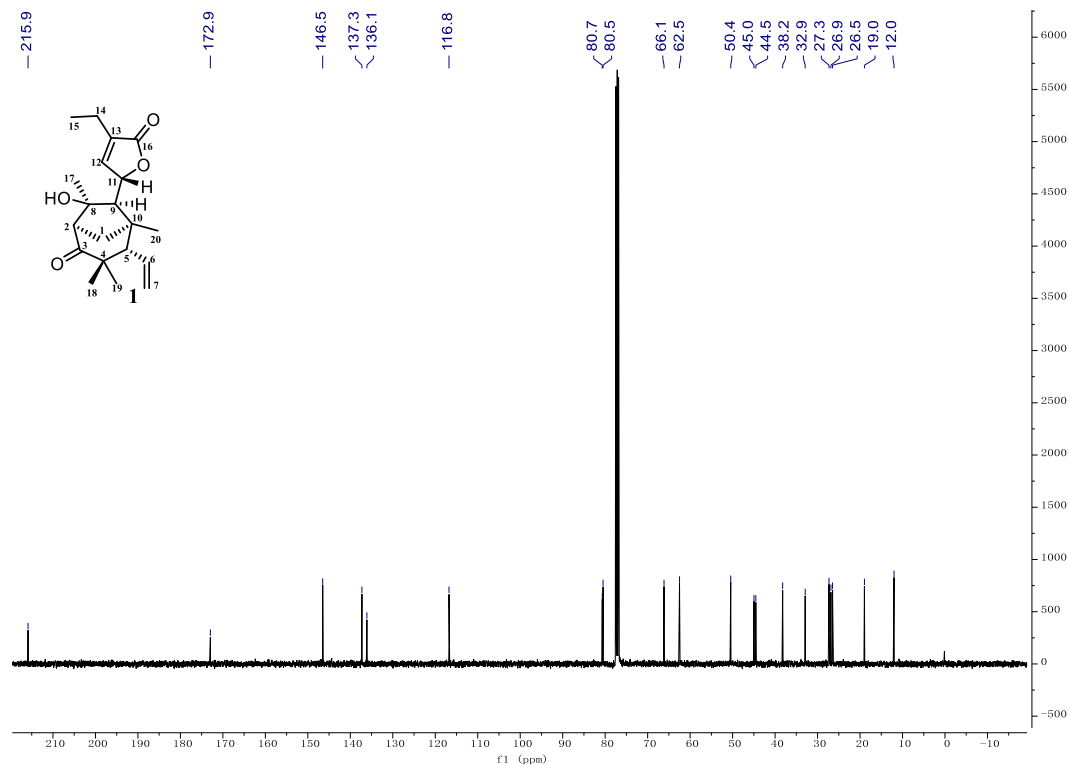

Figure S1-2. <sup>13</sup>C NMR spectrum (400 MHz) of 1 in CDCl<sub>3</sub>.

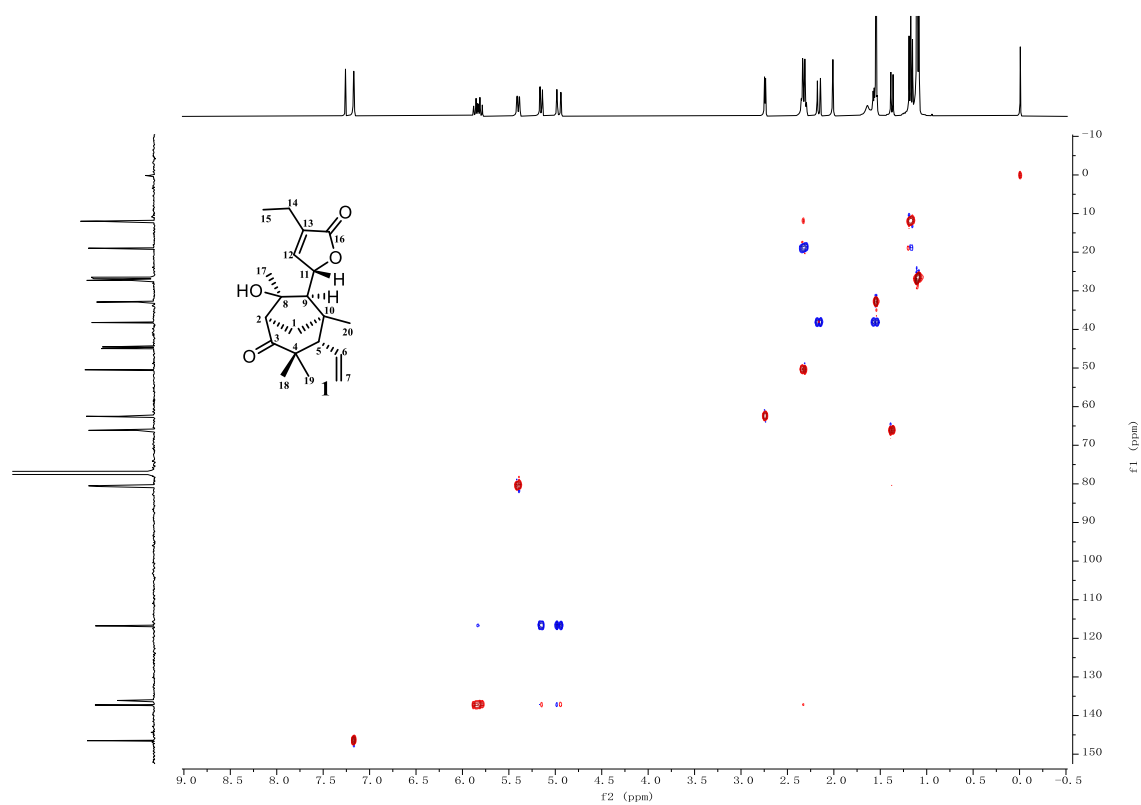

**Figure S1-3.** HSQC spectrum (400 MHz) of **1** in CDCl<sub>3</sub>.

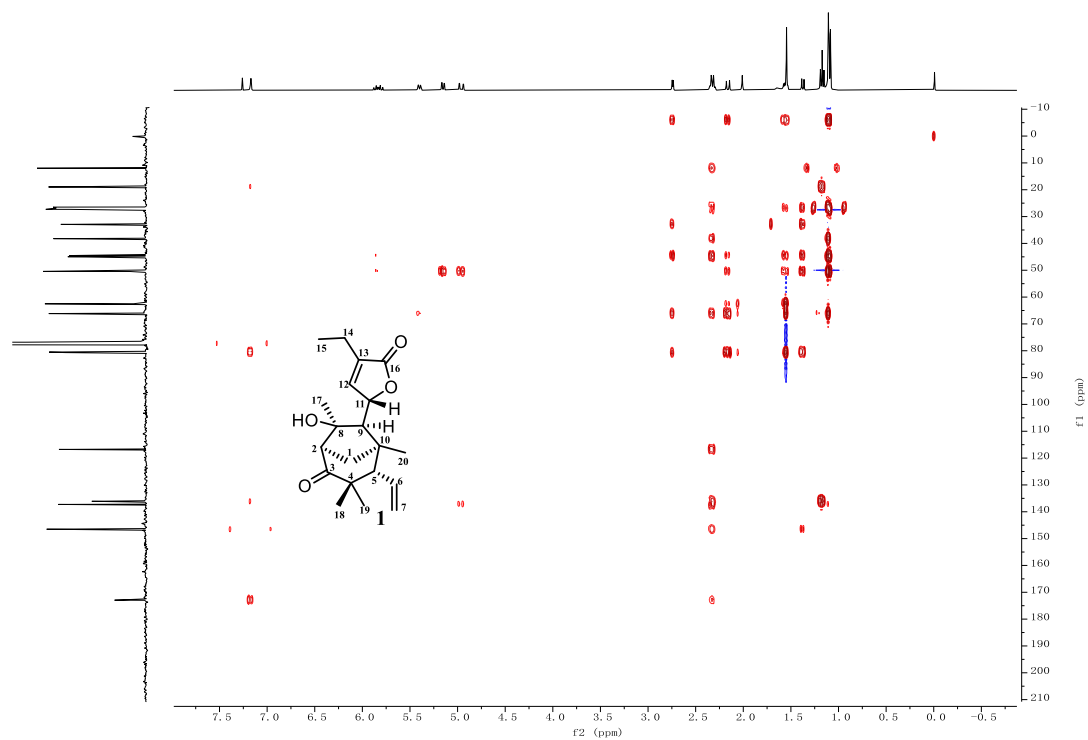

**Figure S1-4.** HMBC spectrum (400 MHz) of **1** in CDCl<sub>3</sub>.

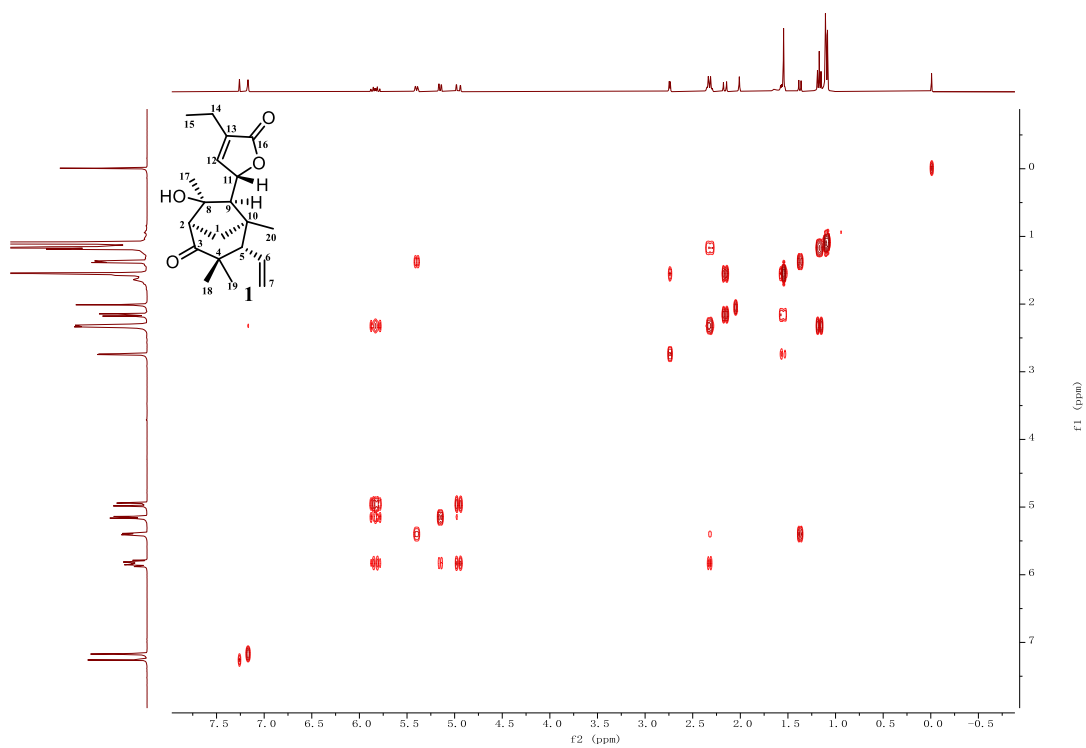

**Figure S1-5.**  $^1\text{H}$ - $^1\text{H}$  COSY spectrum (400 MHz) of **1** in  $\text{CDCl}_3$ .

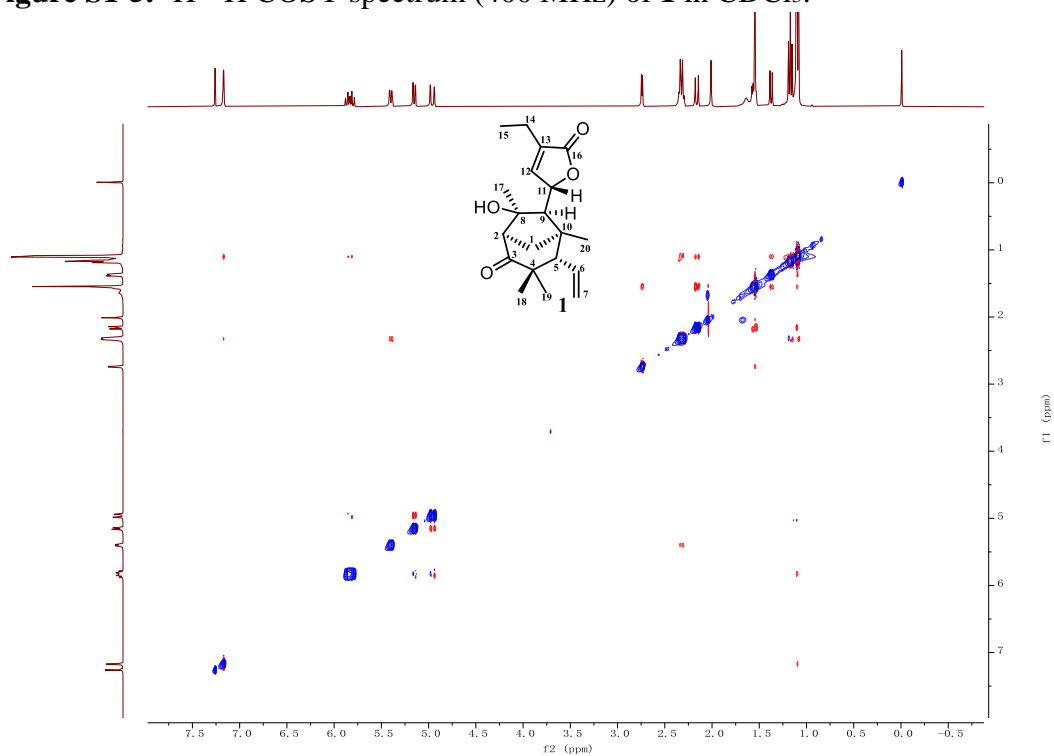

**Figure S1-6.** NOESY spectrum (400 MHz) of **1** in  $\text{CDCl}_3$ .

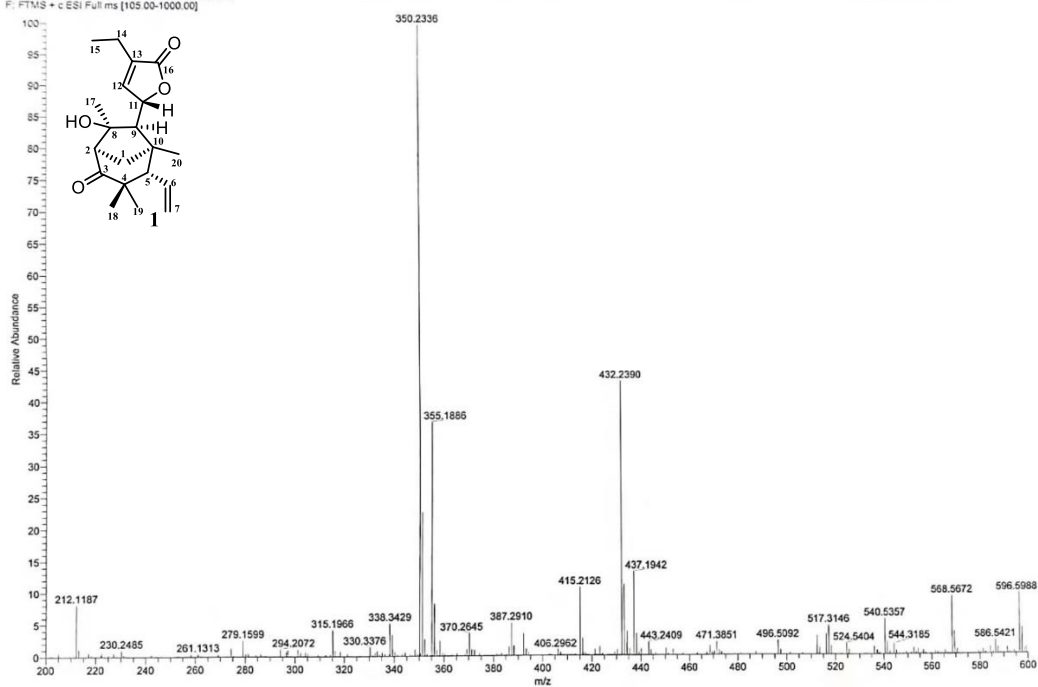

Figure S1-7. HRESIMS spectrum of **1**.

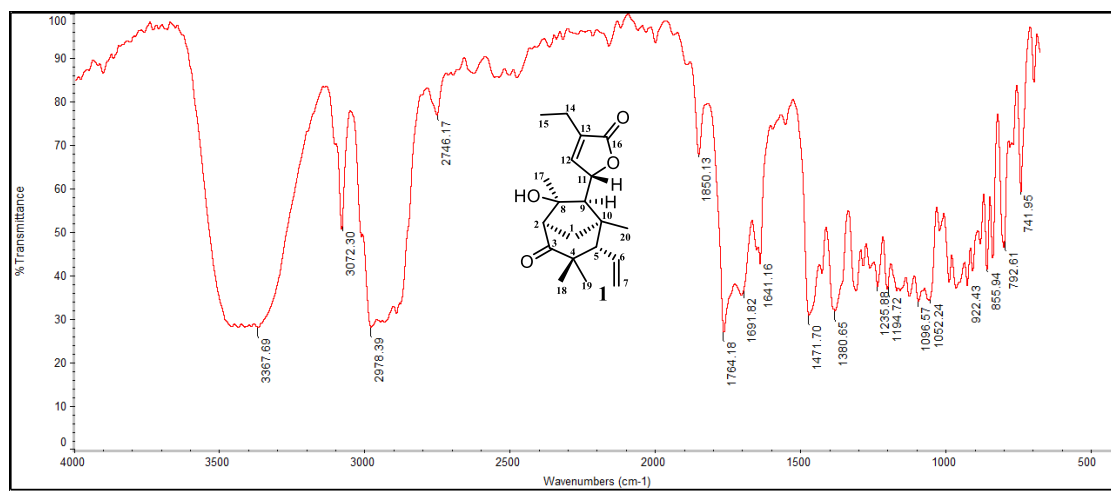

Figure S1-8. IR (KBr disc) spectrum of **1**.

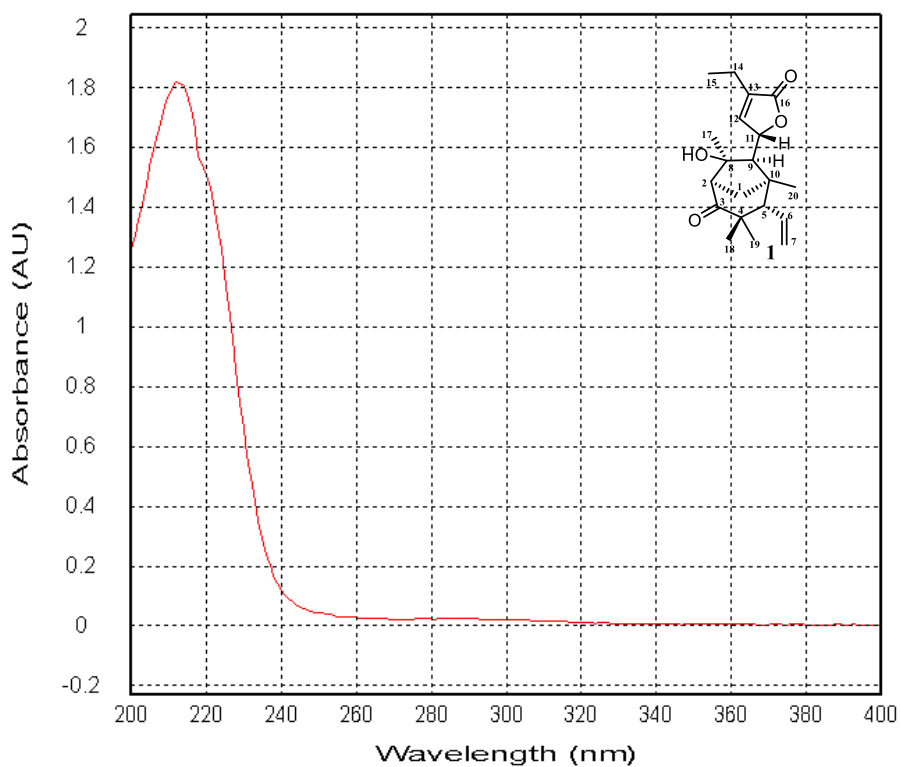

Figure S1-9. UV spectrum of 1.

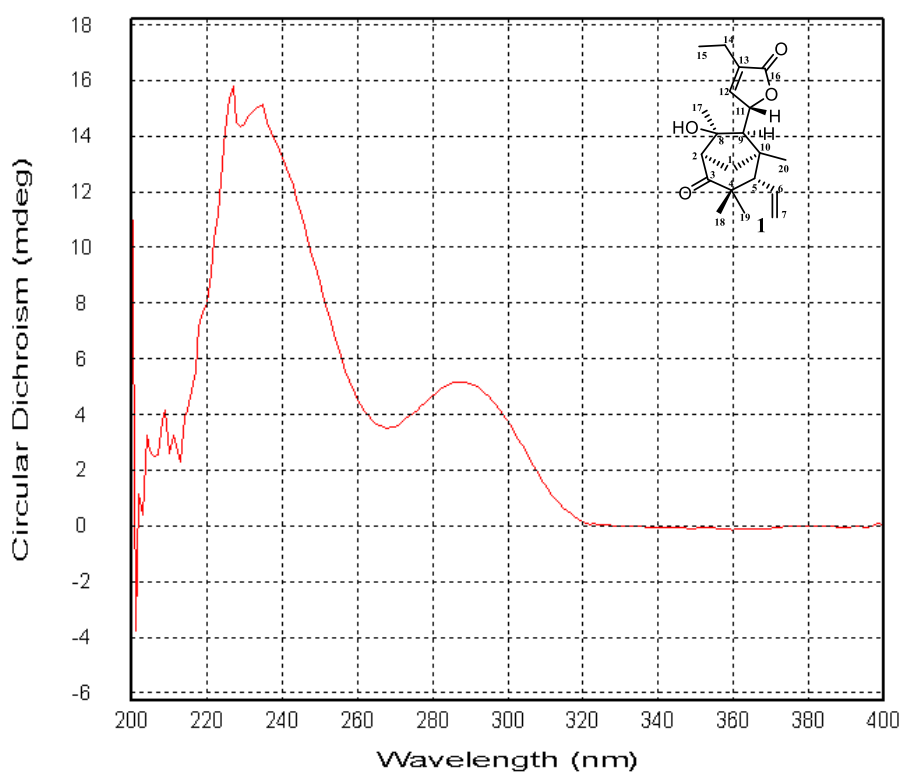

Figure S1-10. CD spectrum of 1.

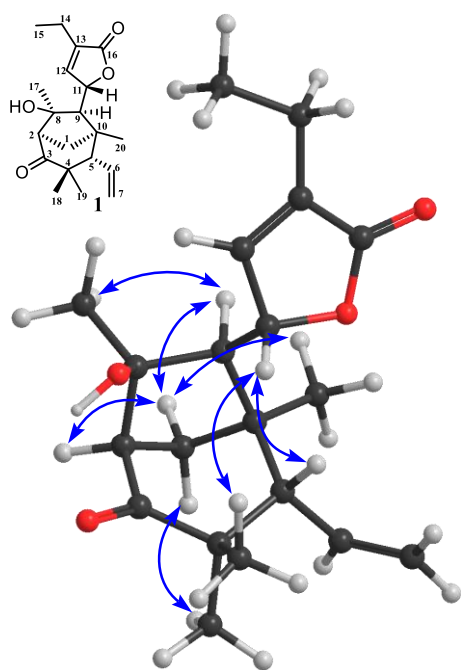

Figure S1-11. NOESY signals of **1**.

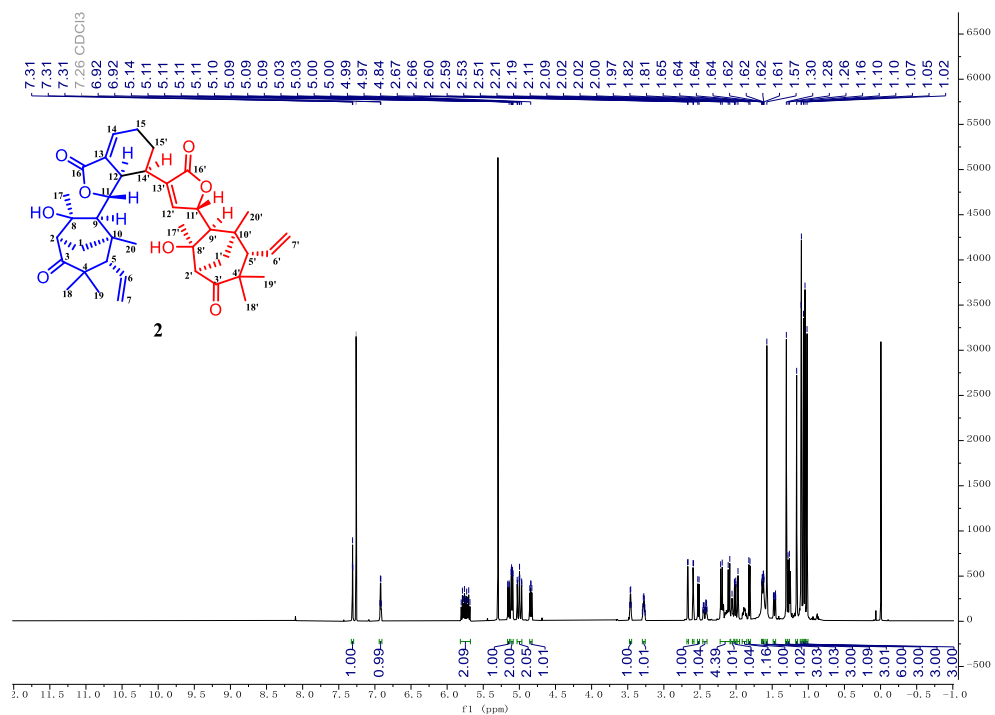

Figure S2-1. <sup>1</sup>H NMR spectrum (400 MHz) of **2** in CDCl<sub>3</sub>.

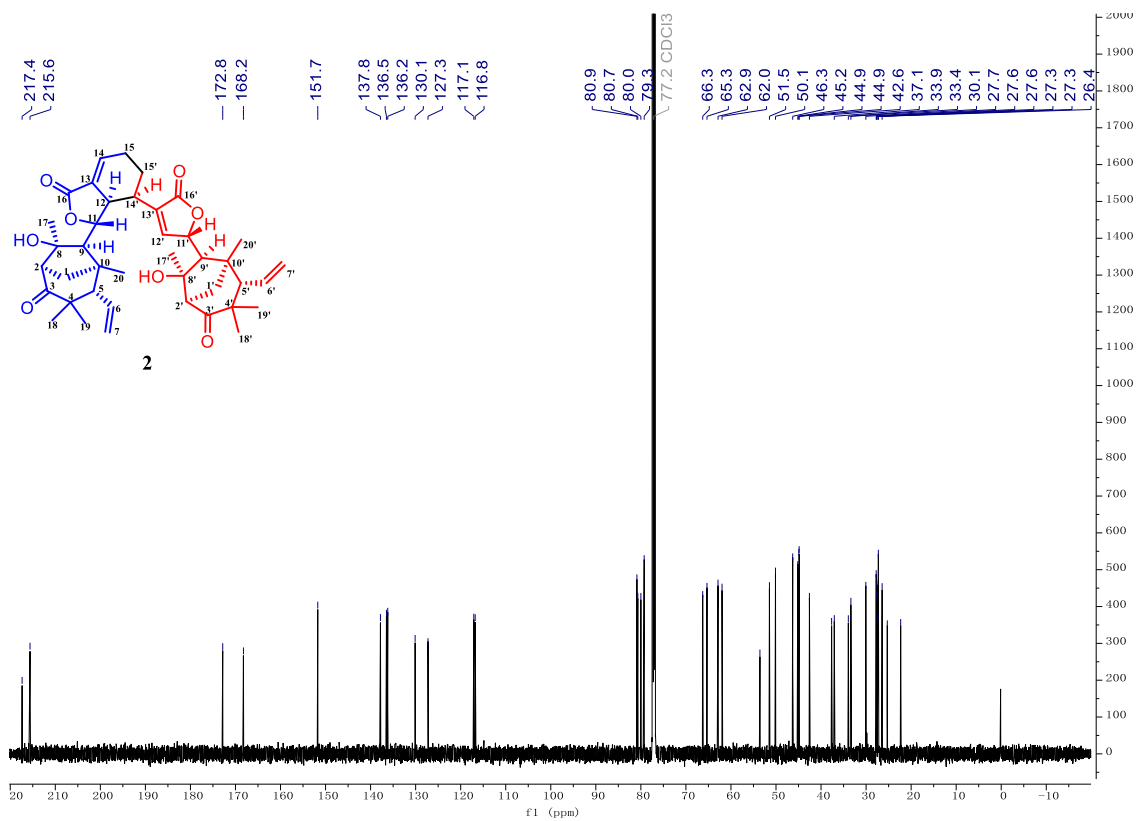

Figure S2-2.  $^{13}\text{C}$  NMR spectrum (600 MHz) of **2** in  $\text{CDCl}_3$ .

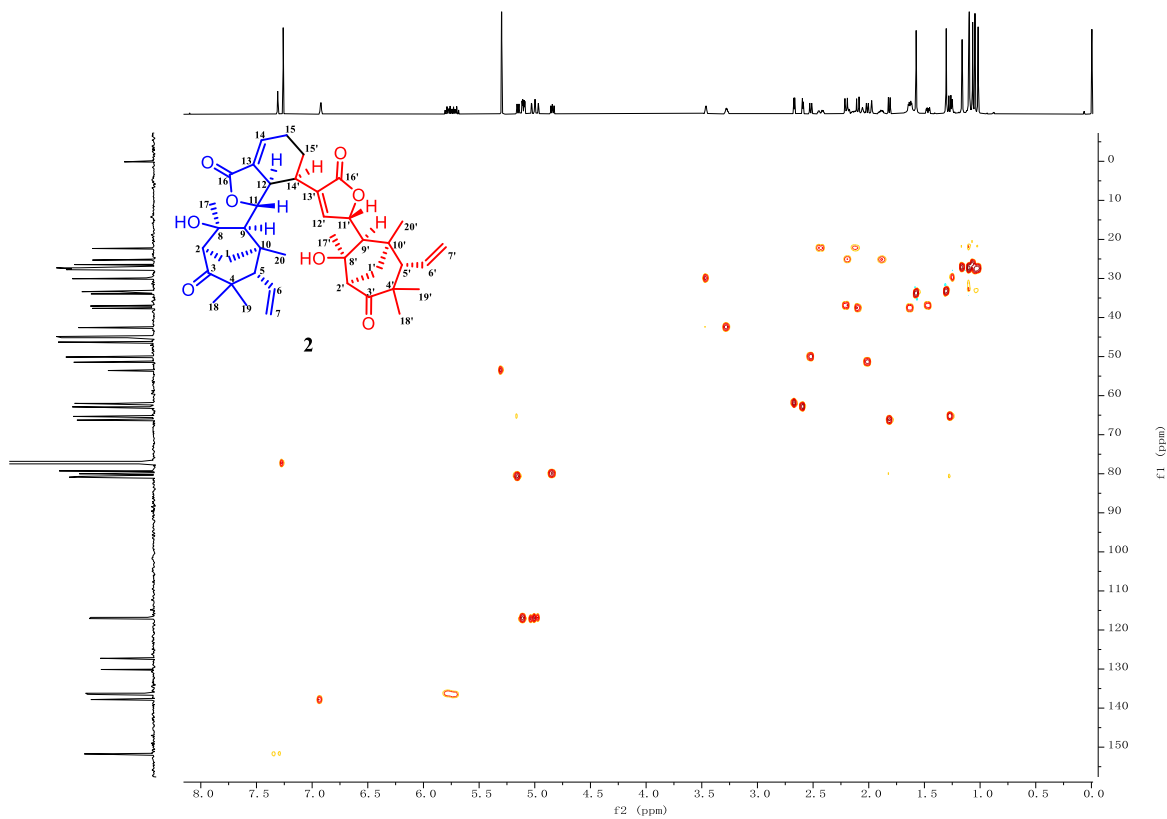

Figure S2-3. HSQC spectrum (600 MHz) of **2** in  $\text{CDCl}_3$ .

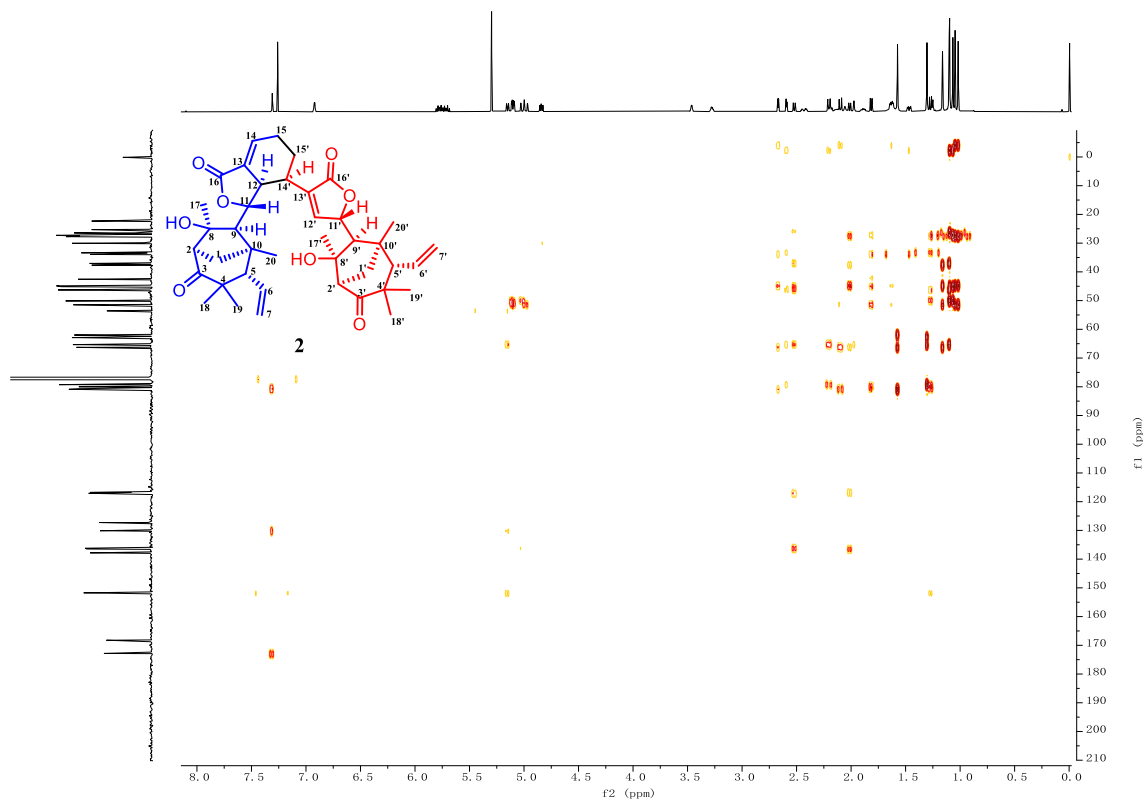

Figure S2-4. HMBC spectrum (600 MHz) of **2** in CDCl<sub>3</sub>.

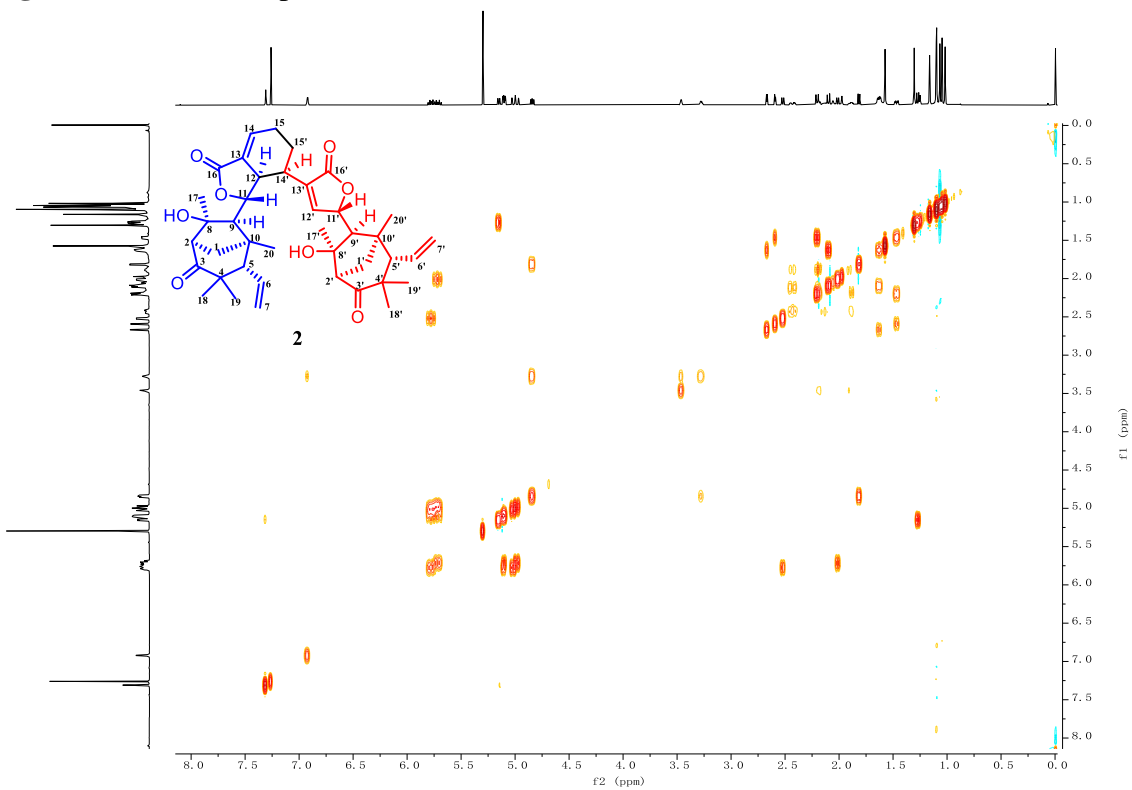

Figure S2-5. <sup>1</sup>H-<sup>1</sup>H COSY spectrum (600 MHz) of **2** in CDCl<sub>3</sub>.



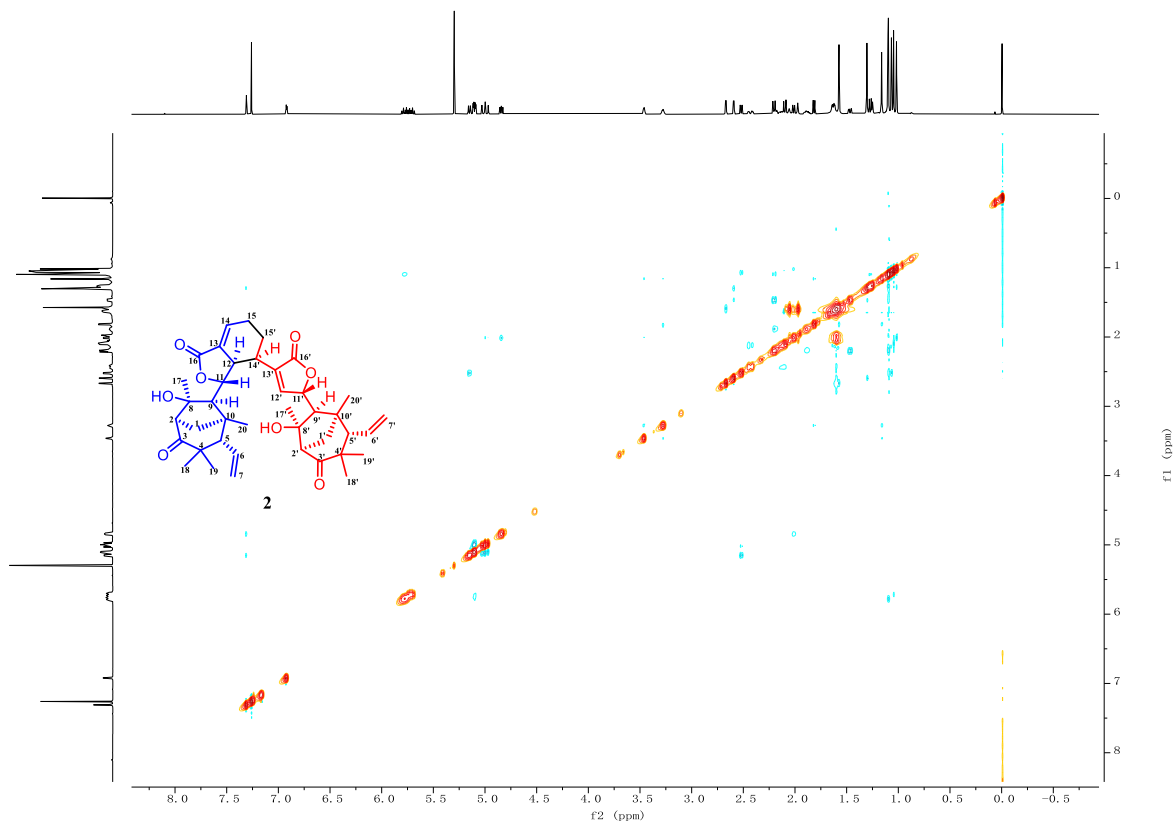

**Figure S2-6.** NOESY spectrum (600MHz) of **2** in CDCl<sub>3</sub>.

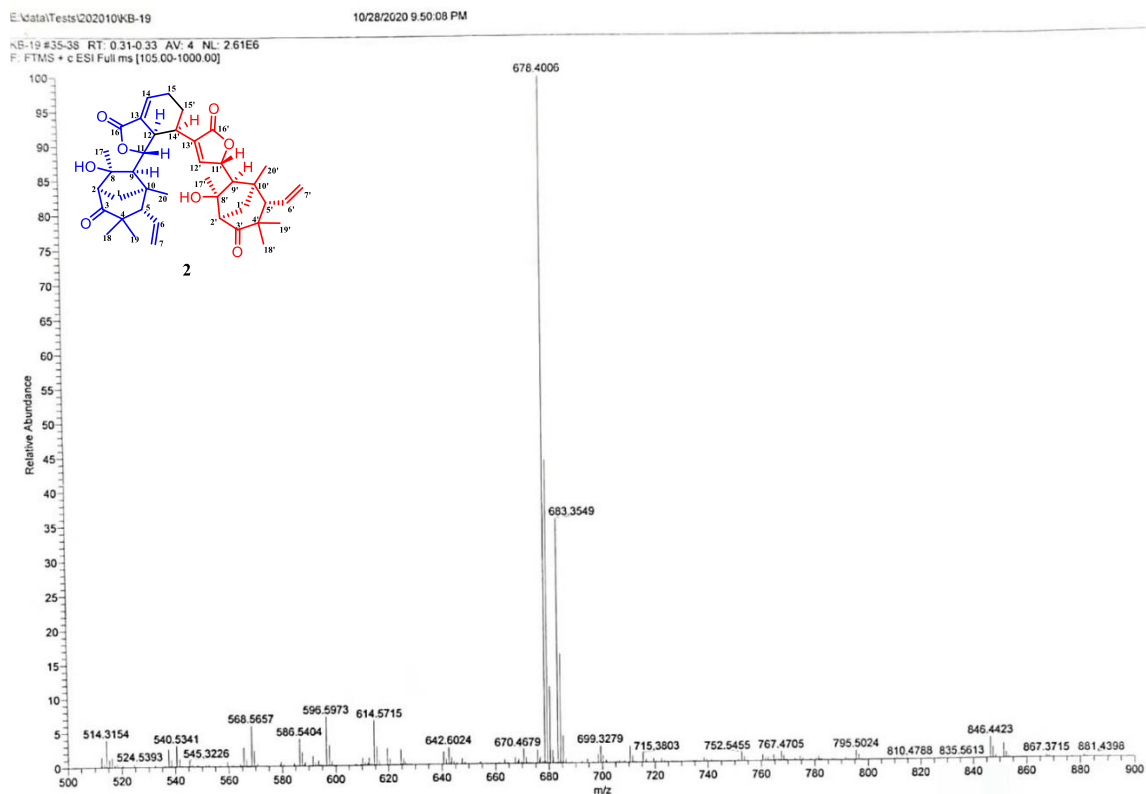

**Figure S2-7.** HRESIMS spectrum of **2**.

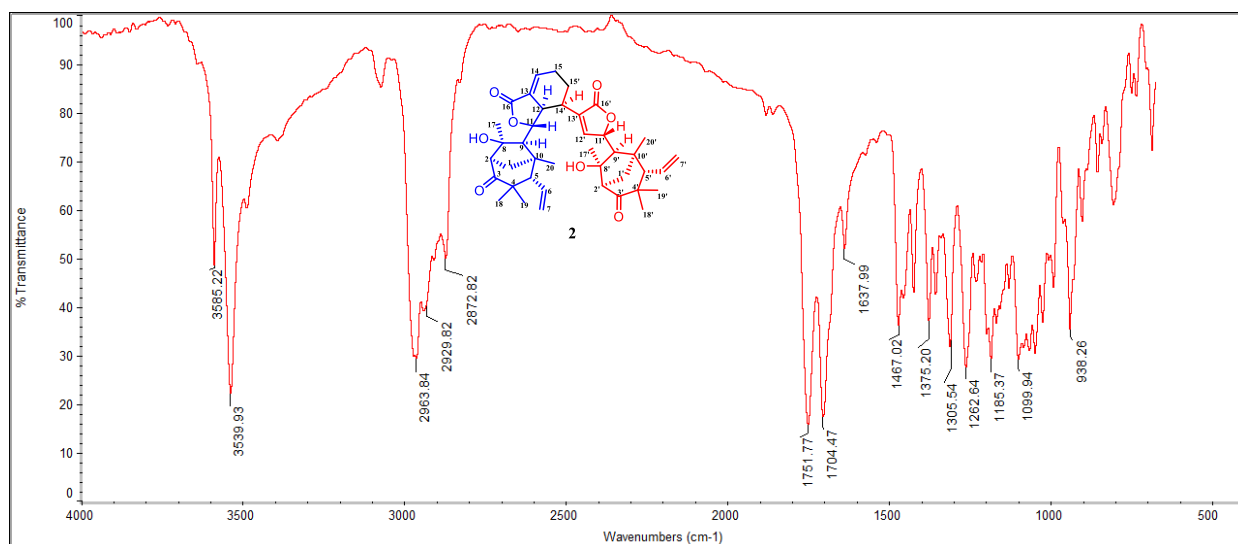

**Figure S2-8.** IR (KBr disc) spectrum of **2**.

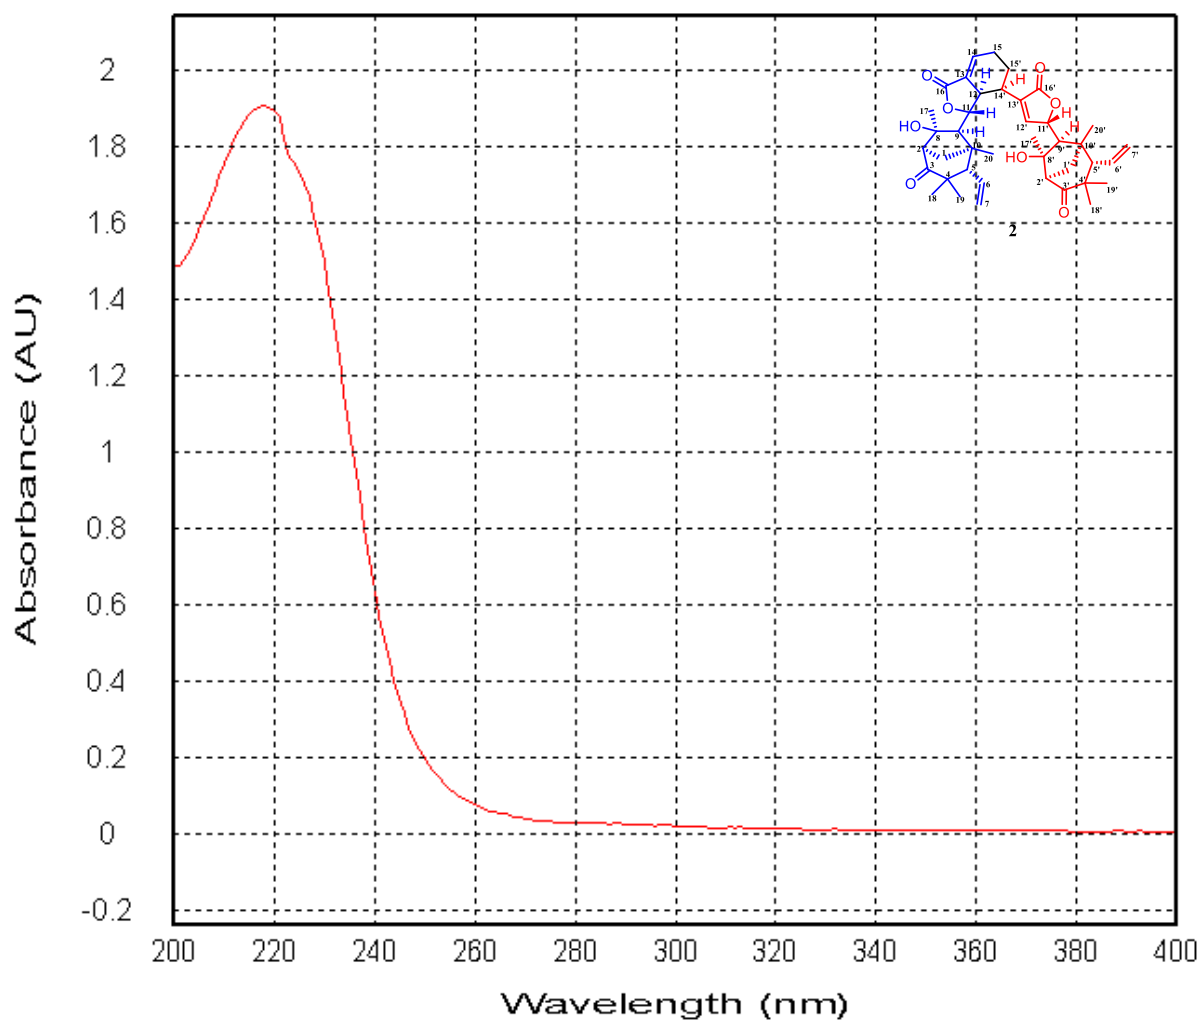

**Figure S2-9.** UV spectrum of **2**.

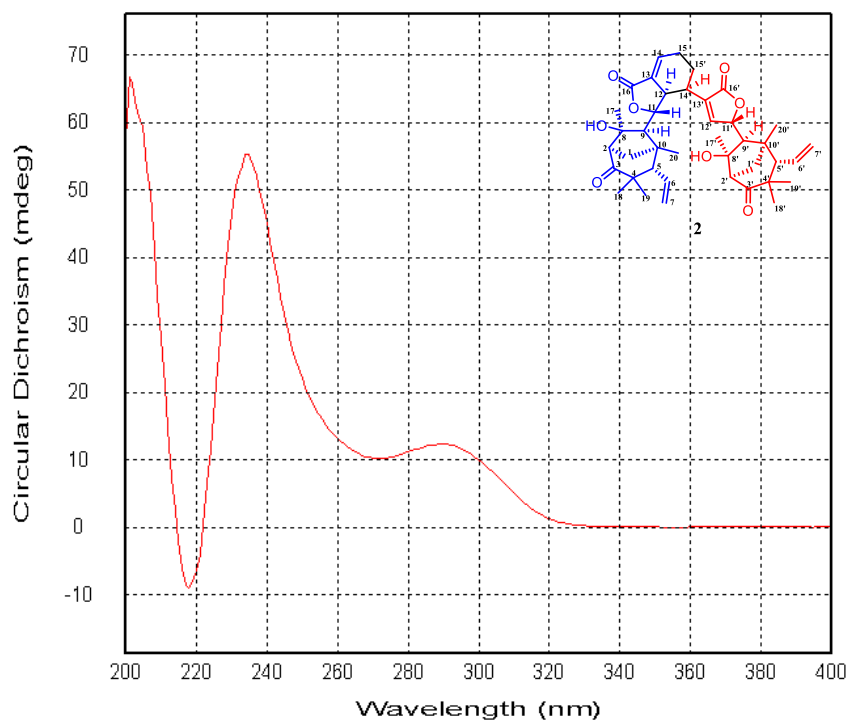

**Figure S2-10.** CD spectrum of **2**.

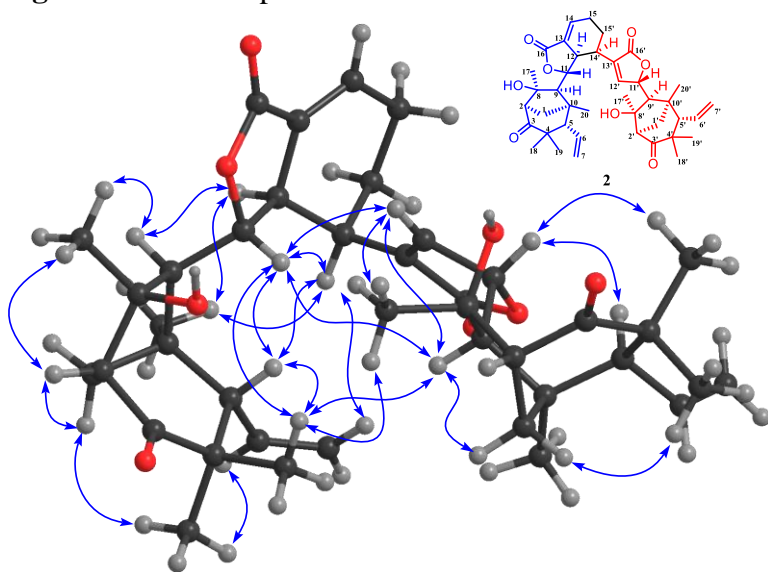

**Figure S2-11.** NOESY signals of **2**

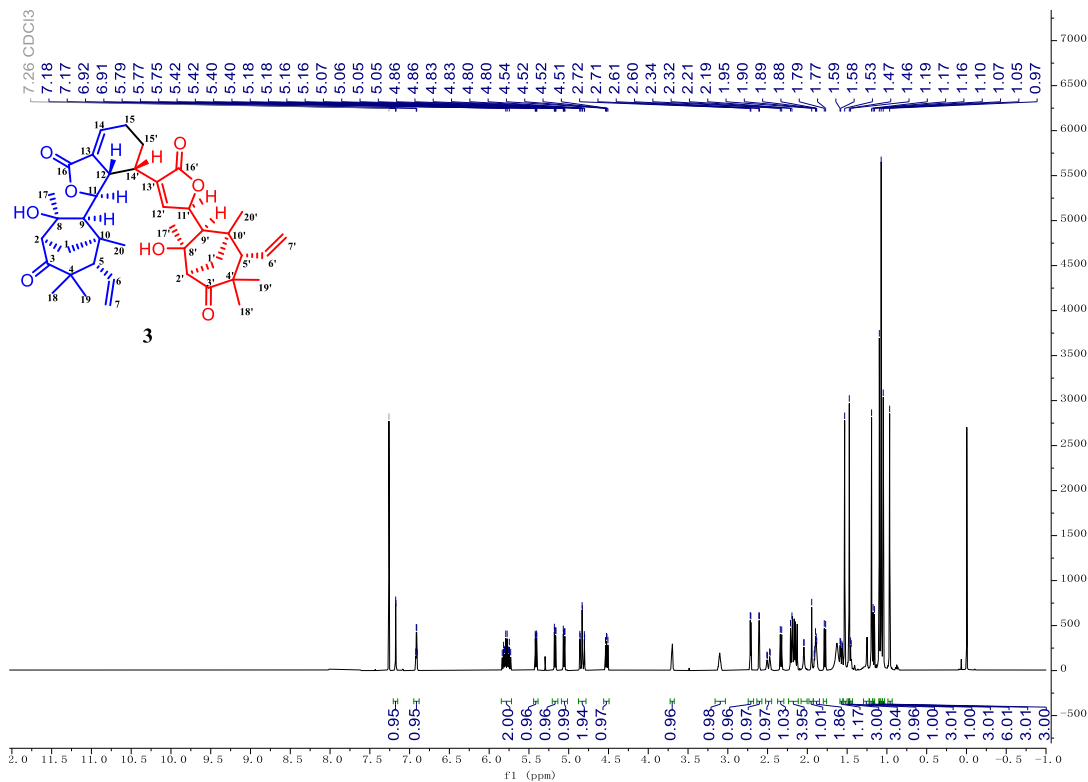

**Figure S3-1.**  $^1\text{H}$  NMR spectrum (600 MHz) of **3** in  $\text{CDCl}_3$ .

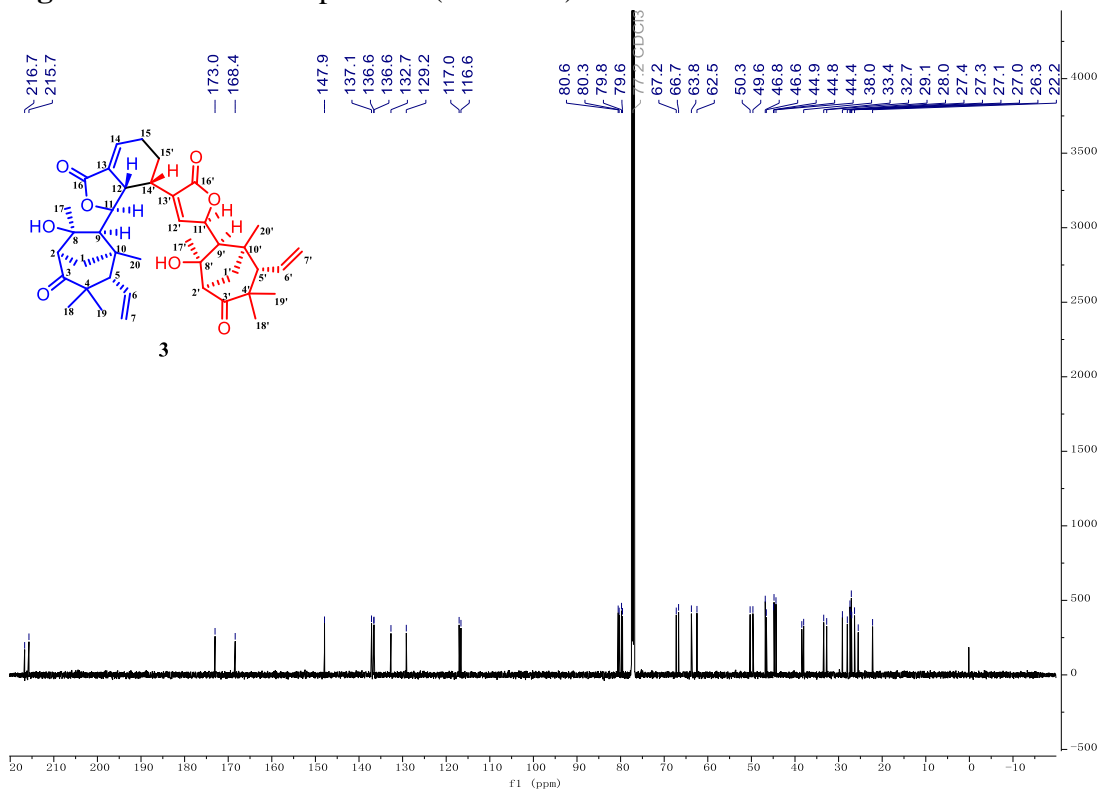

**Figure S3-2.**  $^{13}\text{C}$  NMR spectrum (600 MHz) of **3** in  $\text{CDCl}_3$ .

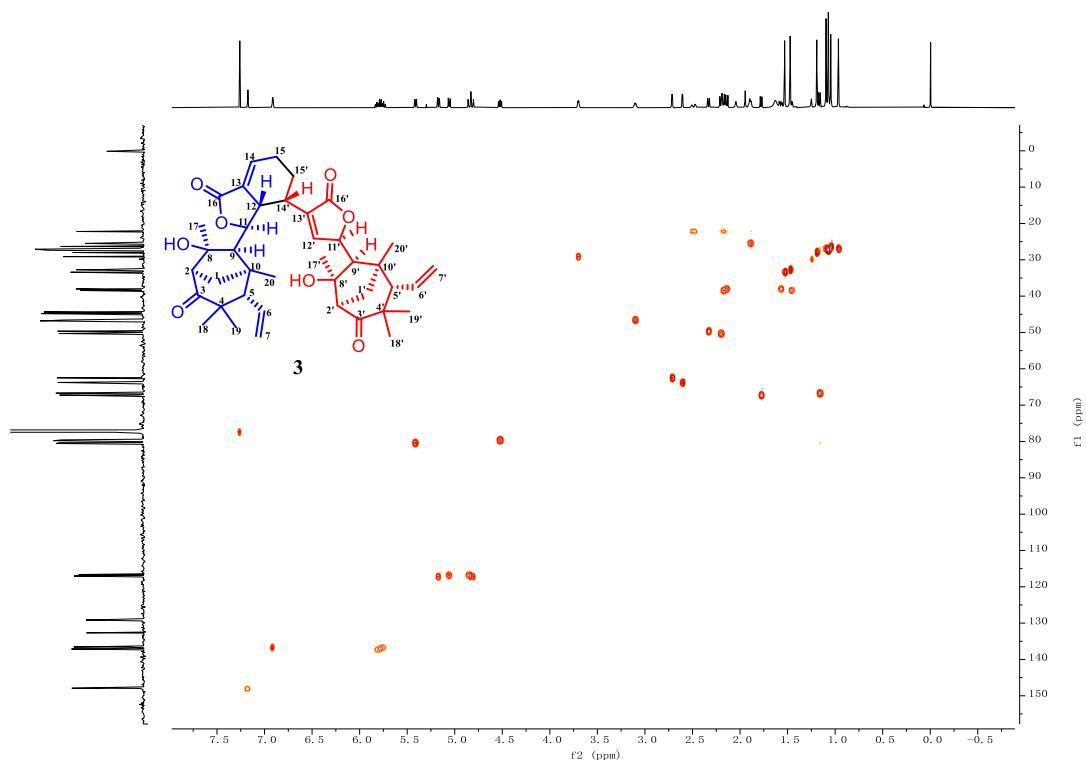

**Figure S3-3.** HSQC spectrum (600 MHz) of **3** in  $\text{CDCl}_3$ .

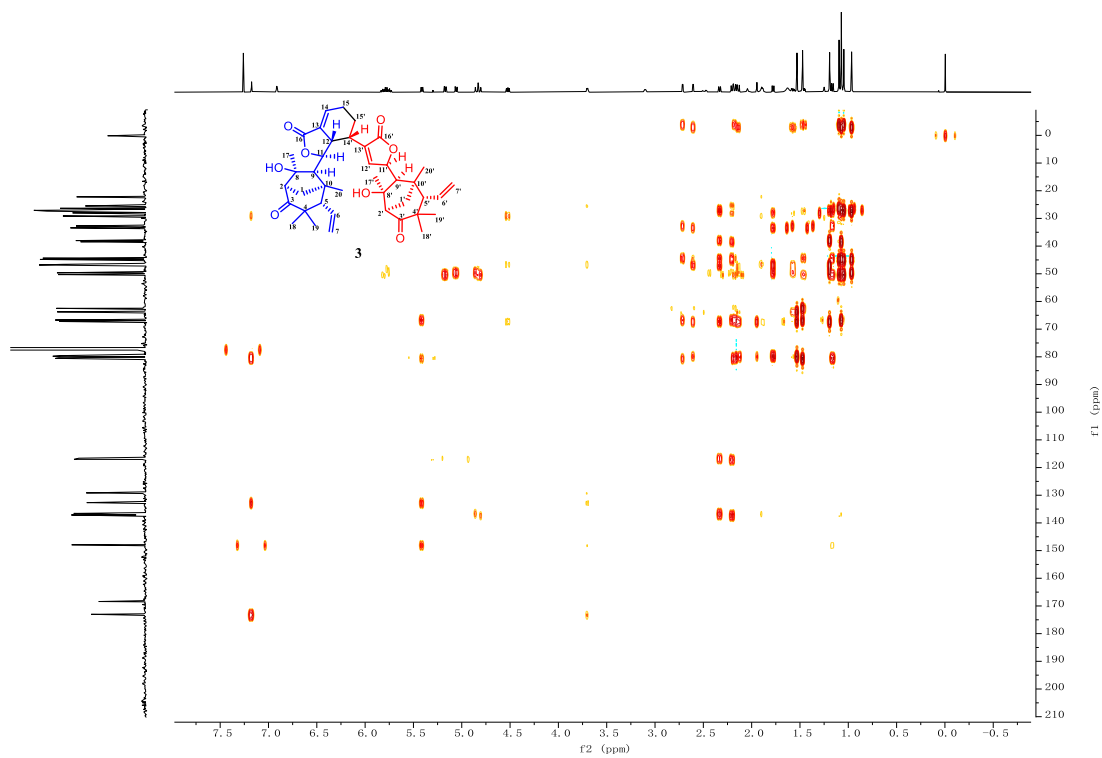

**Figure S3-4.** HMBC spectrum (600 MHz) of **3** in  $\text{CDCl}_3$ .

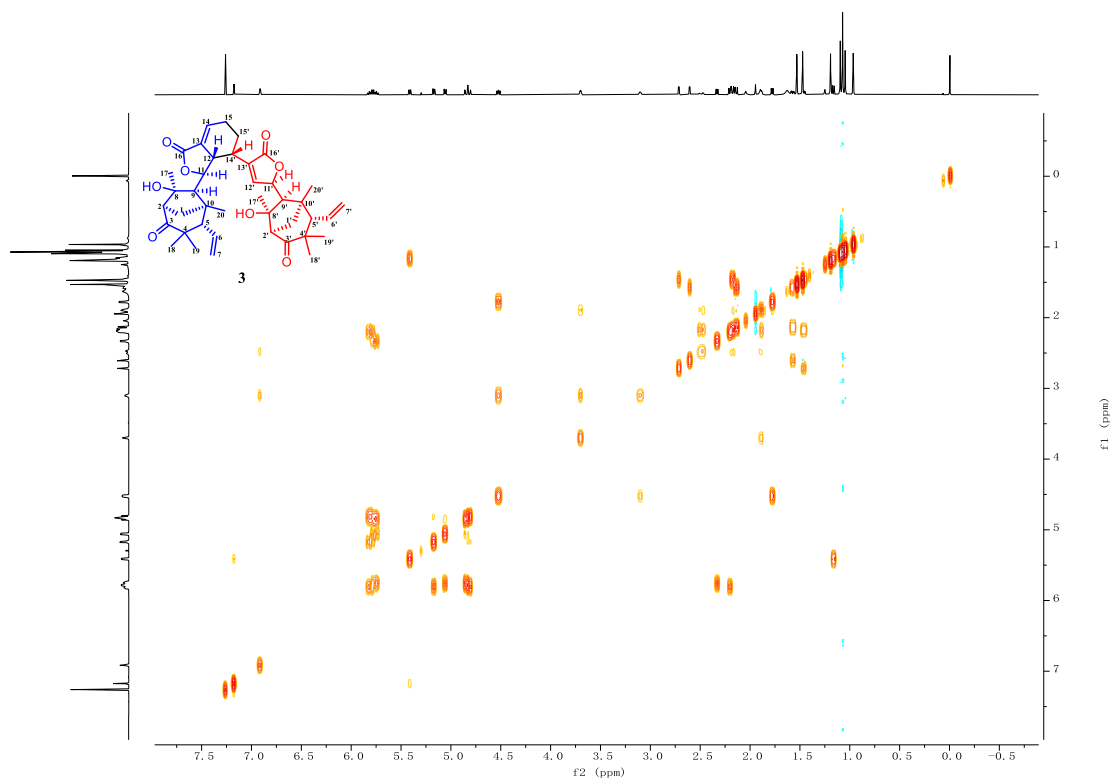

**Figure S3-5.** H-H COSY spectrum (600 MHz) of **3** in CDCl<sub>3</sub>.

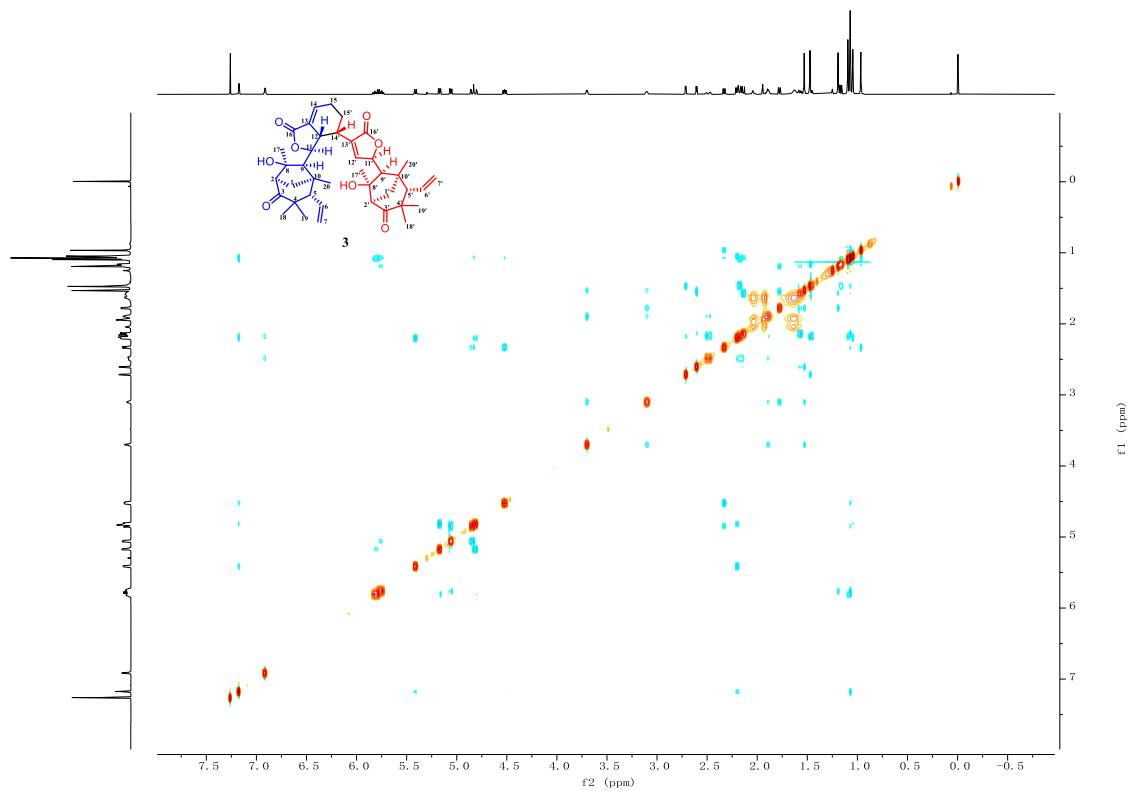

**Figure S3-6.** NOESY spectrum (600 MHz) of **3** in CDCl<sub>3</sub>.

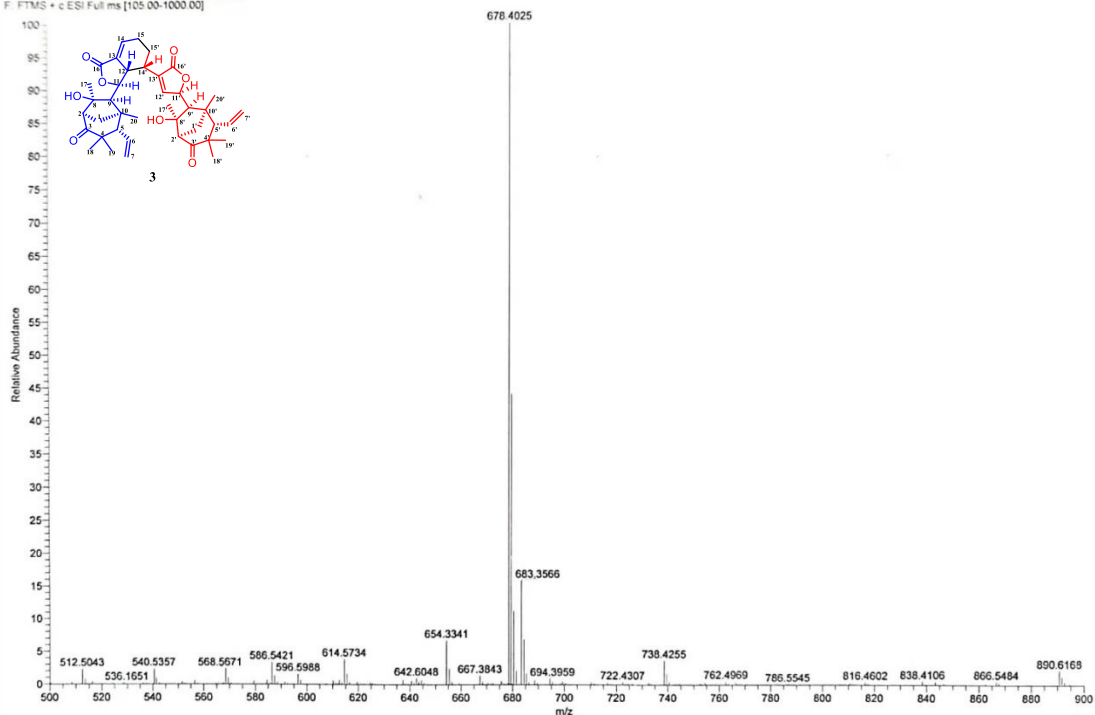

Figure S3-7. HRESIMS spectrum of **3**.

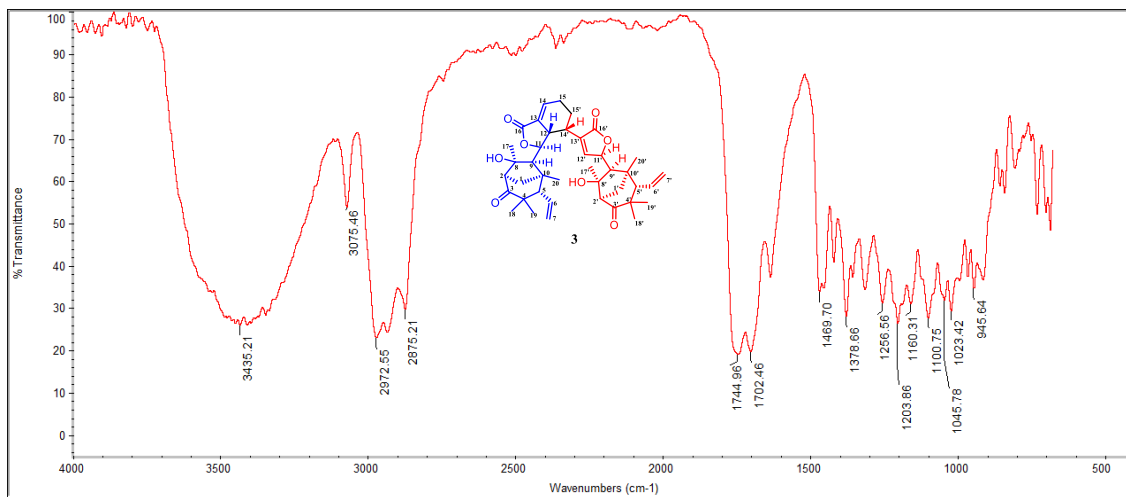

Figure S3-8. IR (KBr disc) spectrum of **3**.

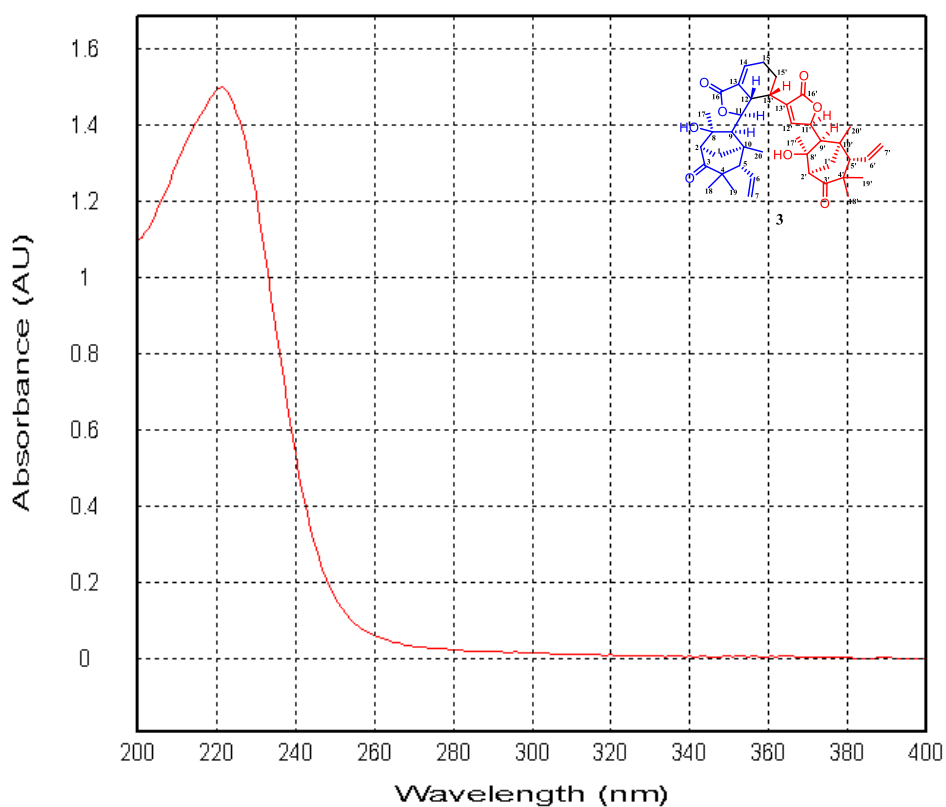

Figure S3-9. UV spectrum of 3.

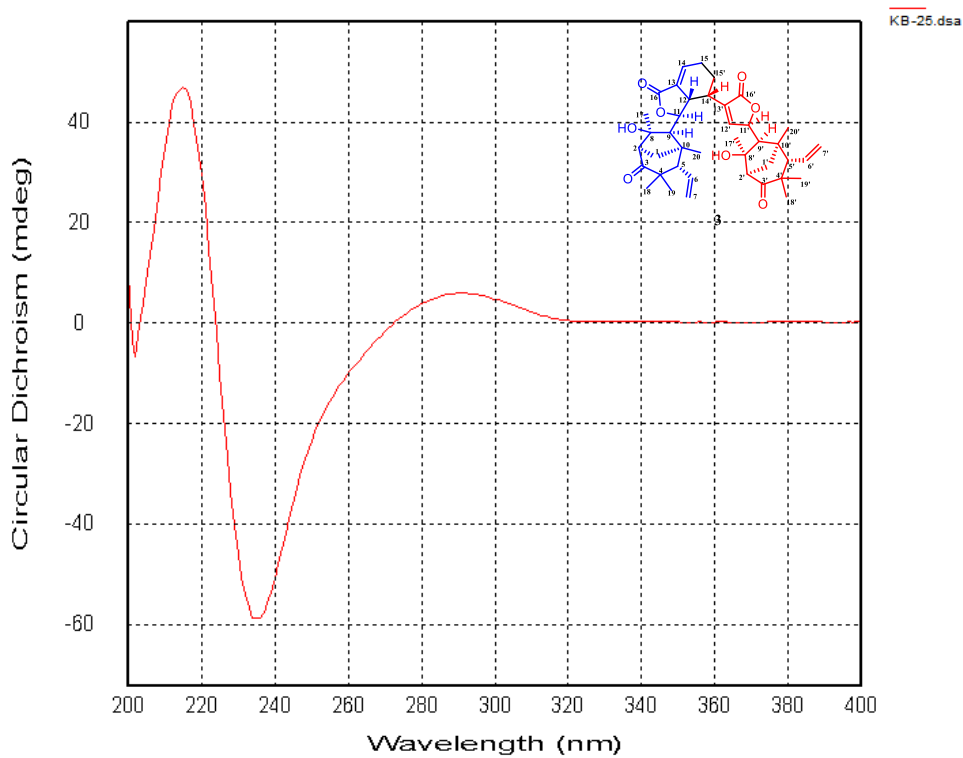

Figure S3-10. CD spectrum of 3.



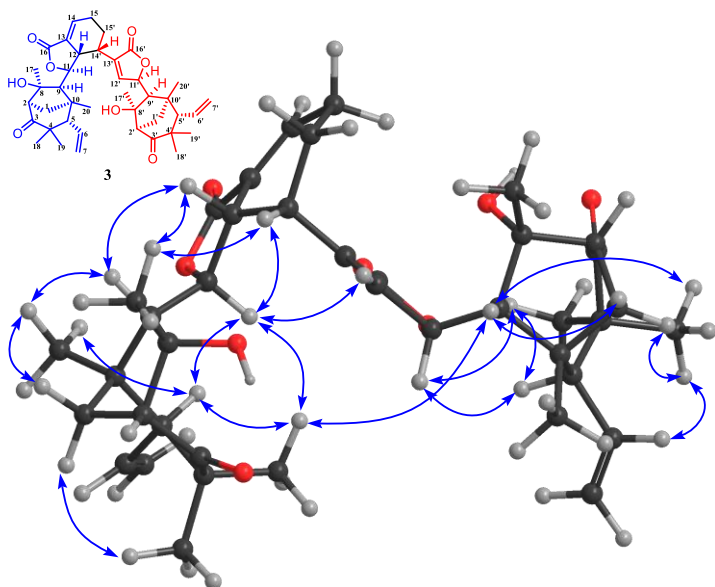

3 NOESY

Figure S3-11. NOESY signals of 3.

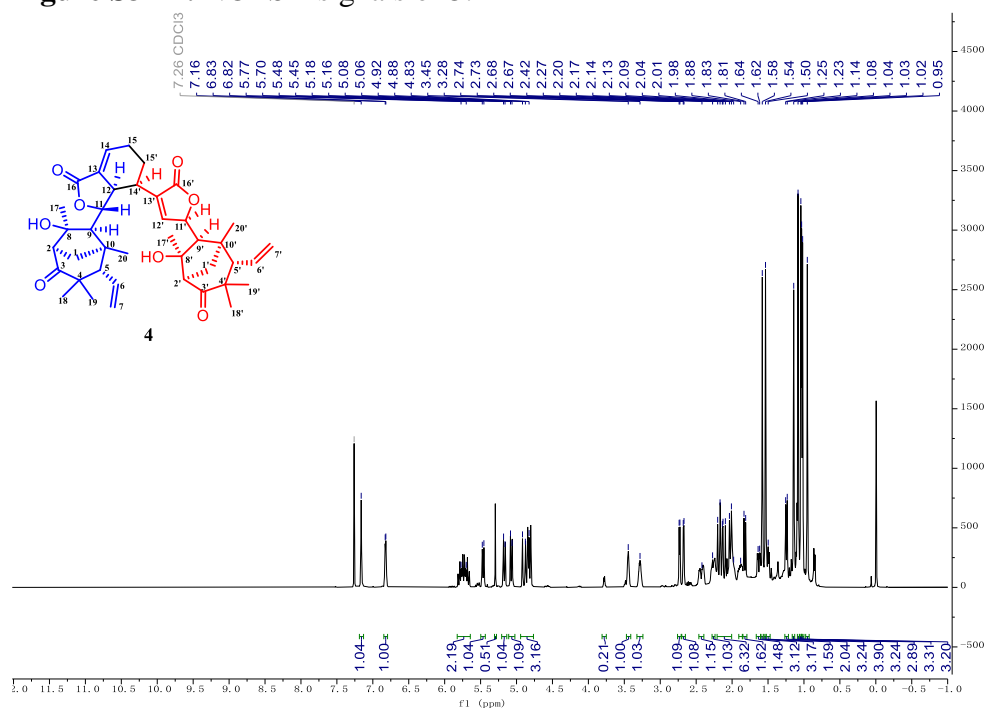

Figure S4-1.  $^1\text{H}$  NMR spectrum (400 MHz) of 4 in  $\text{CDCl}_3$ .

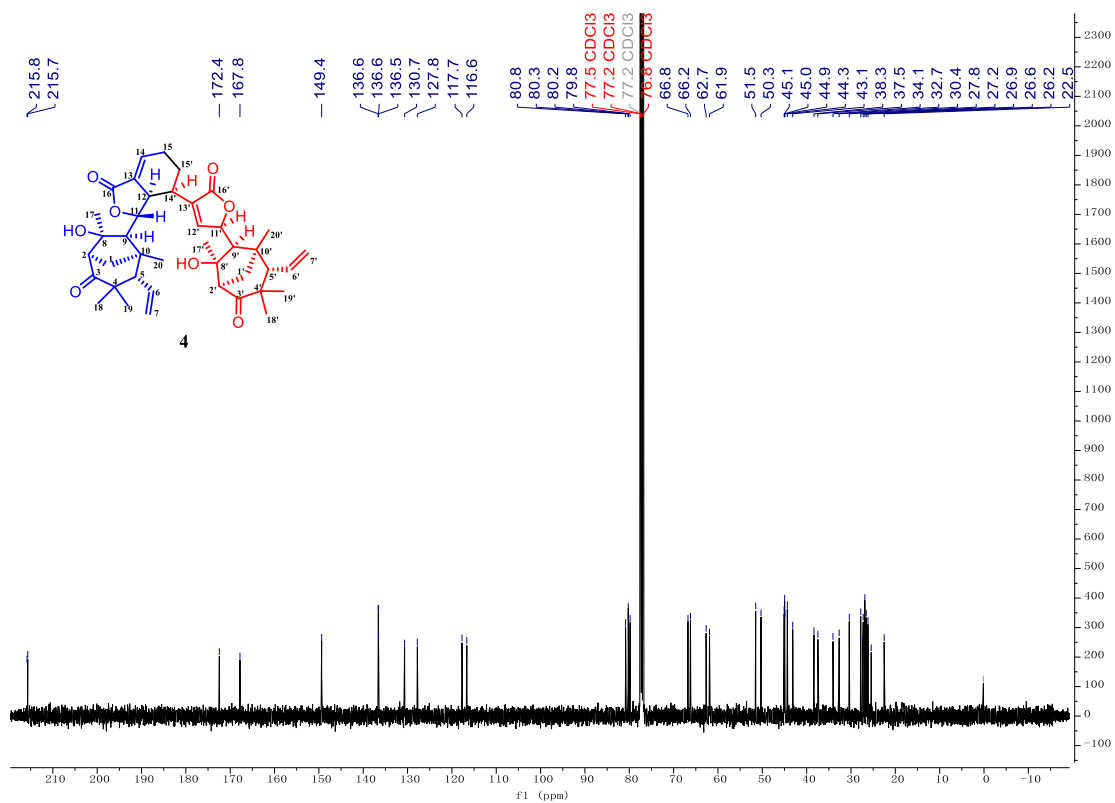

Figure S4-2.  $^{13}\text{C}$  NMR spectrum (400 MHz) of **4** in  $\text{CDCl}_3$ .

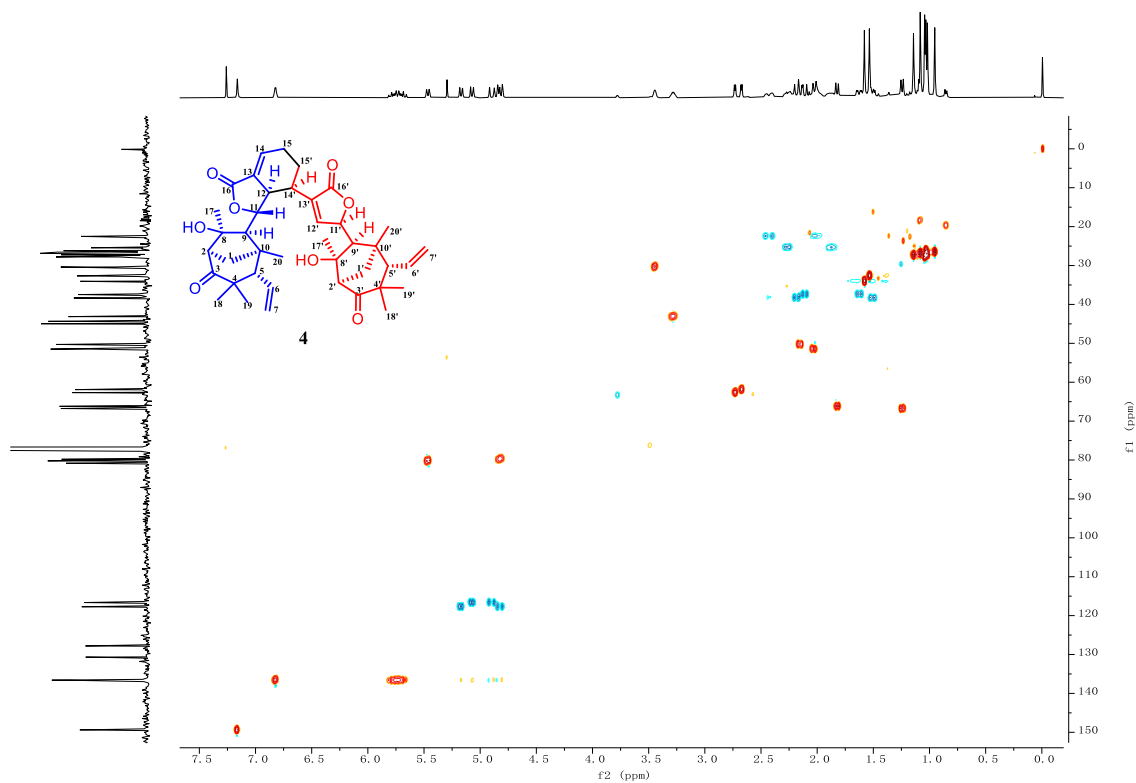

Figure S4-3. HSQC spectrum (400 MHz) of **4** in  $\text{CDCl}_3$ .

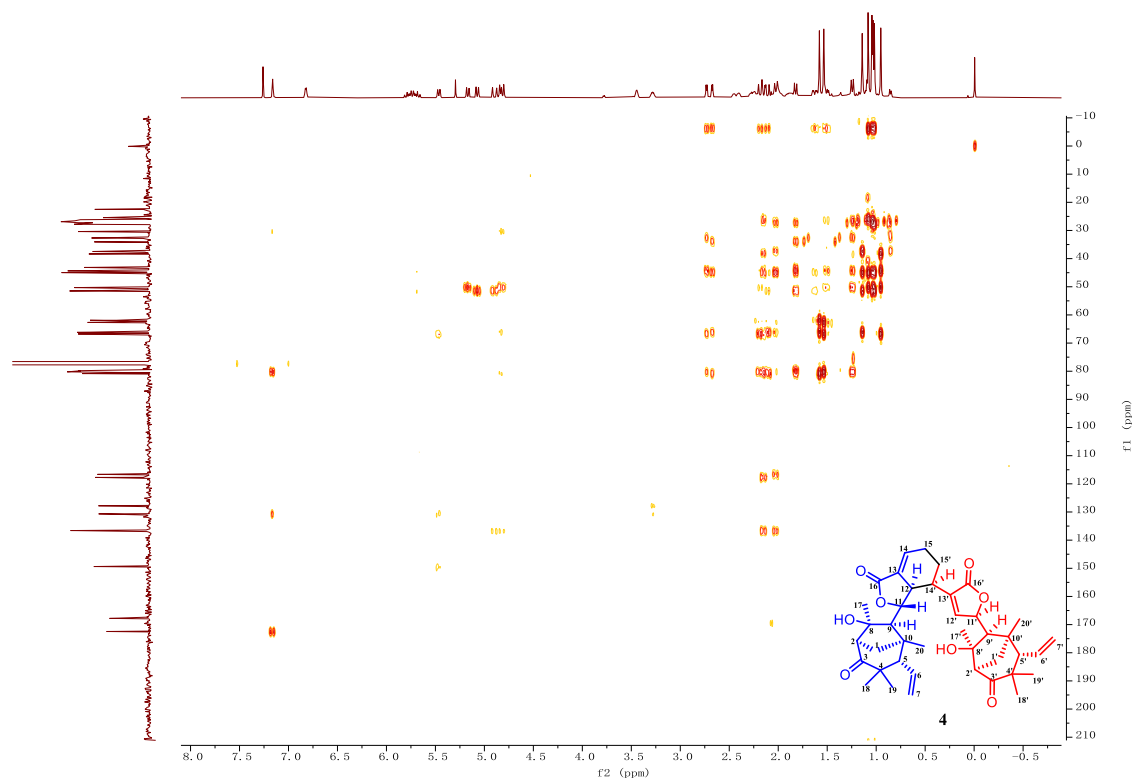

**Figure S4-4.** HMBC spectrum (400 MHz) of **4** in CDCl<sub>3</sub>.

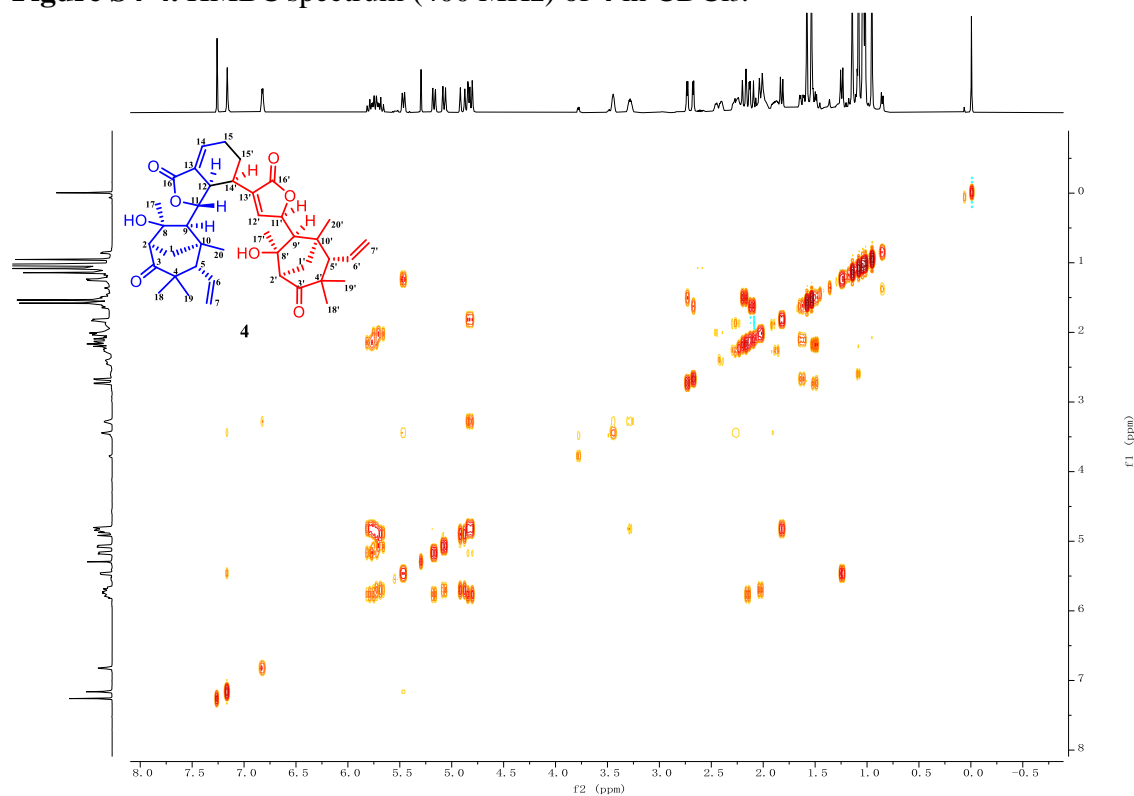

**Figure S4-5.** H-H COSY spectrum (400 MHz) of **4** in CDCl<sub>3</sub>.

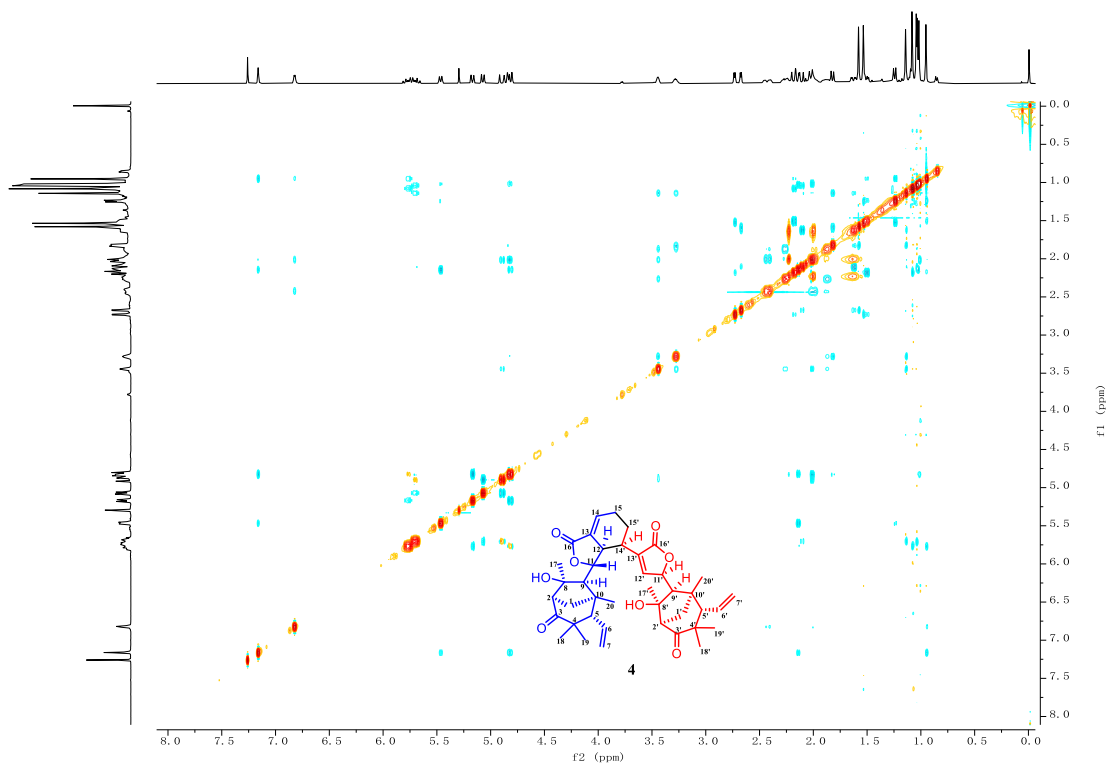

**Figure S4-6.** NOESY spectrum (400 MHz) of **4** in CDCl<sub>3</sub>.

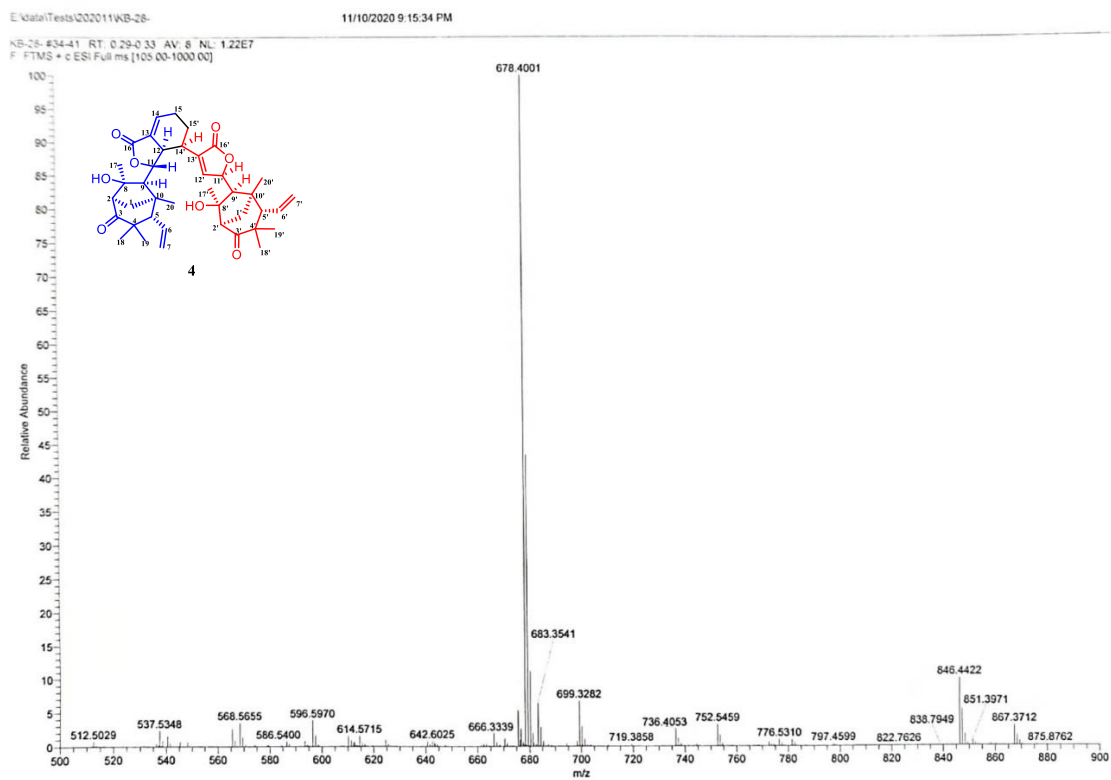

**Figure S4-7.** HRESIMS spectrum of **4**

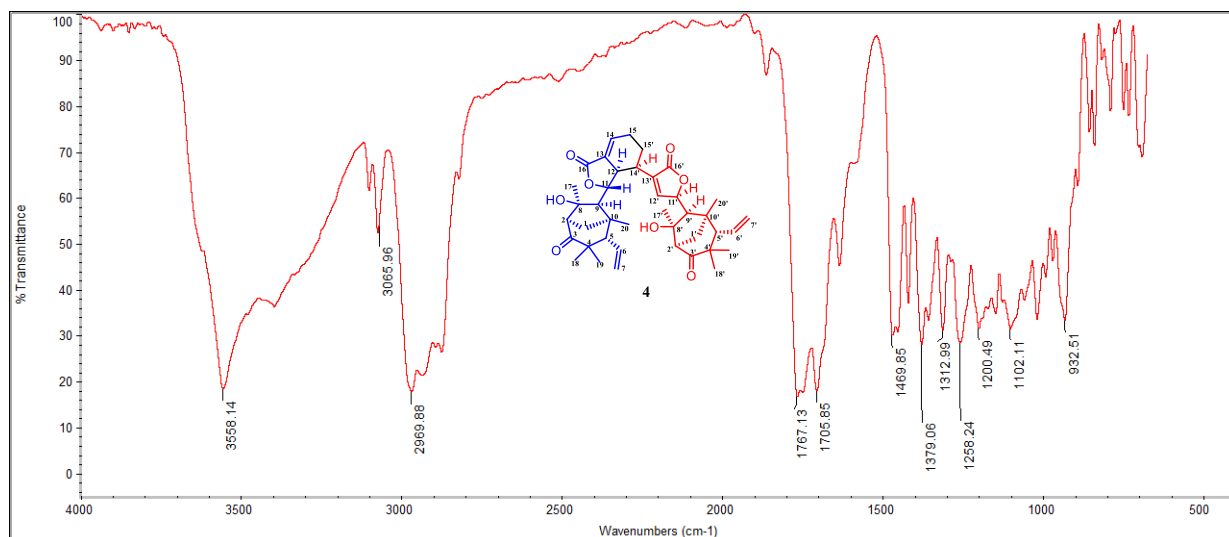

**Figure S4-8.** IR (KBr disc) spectrum of **4**.

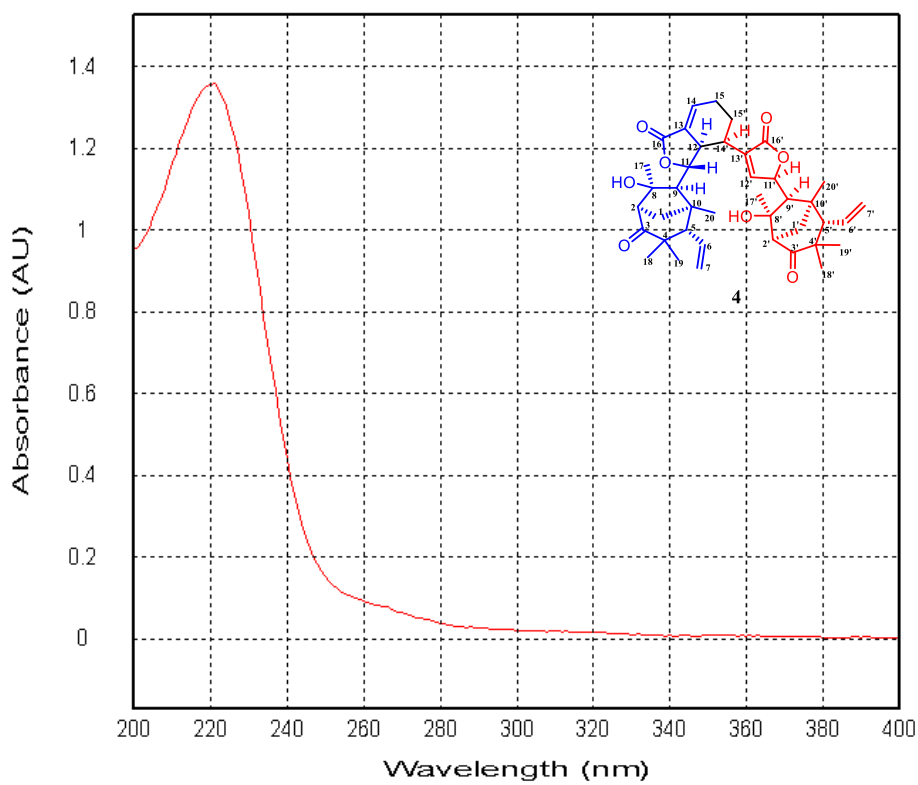

**Figure S4-9.** UV spectrum of **4**.

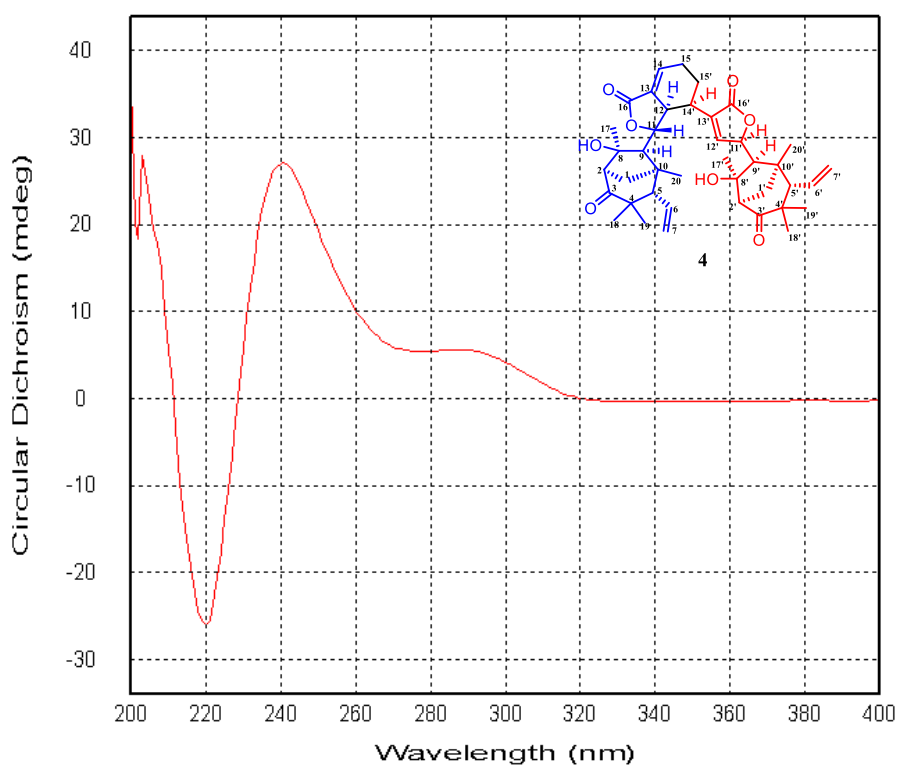

Figure S4-10. CD spectrum of **4**.

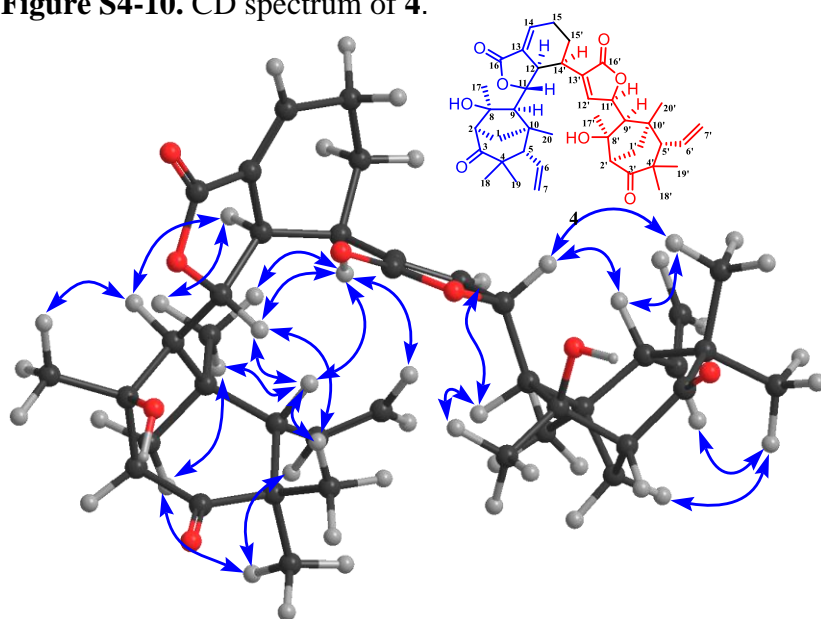

4 NOESY

Figure S4-11. NOESY signals of **4**.

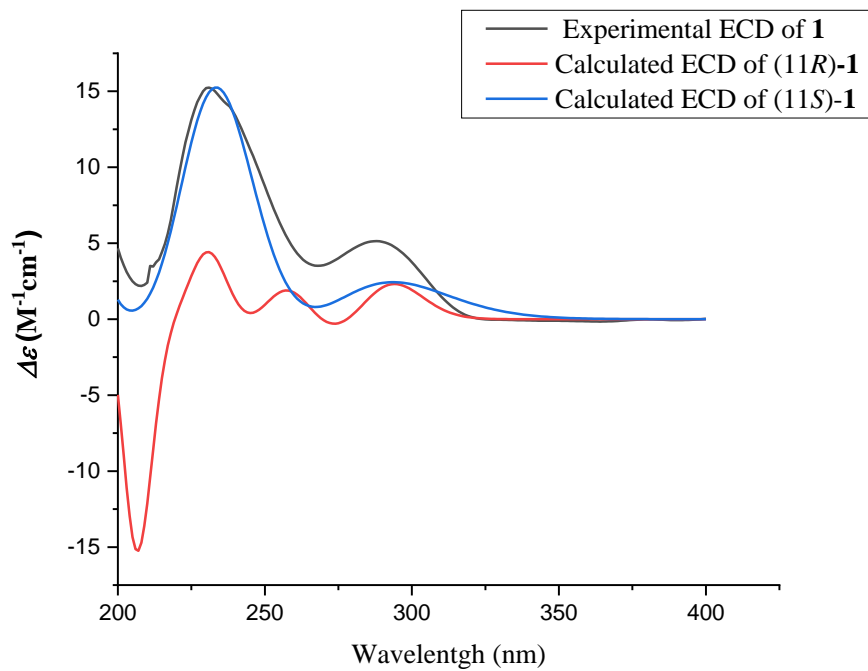

**Figure S5.** Experimental and calculated ECD spectra for compound **1**.

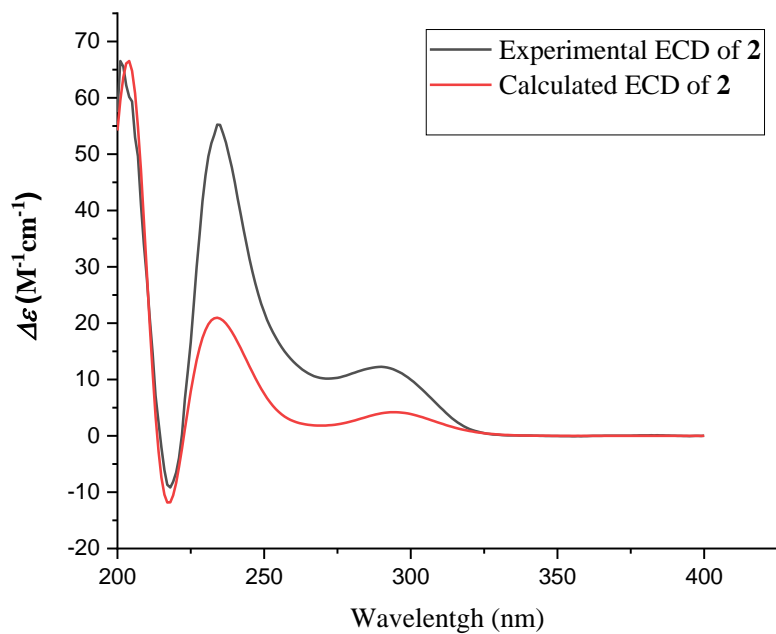

**Figure S6.** Experimental and calculated ECD spectra for compound **2**.

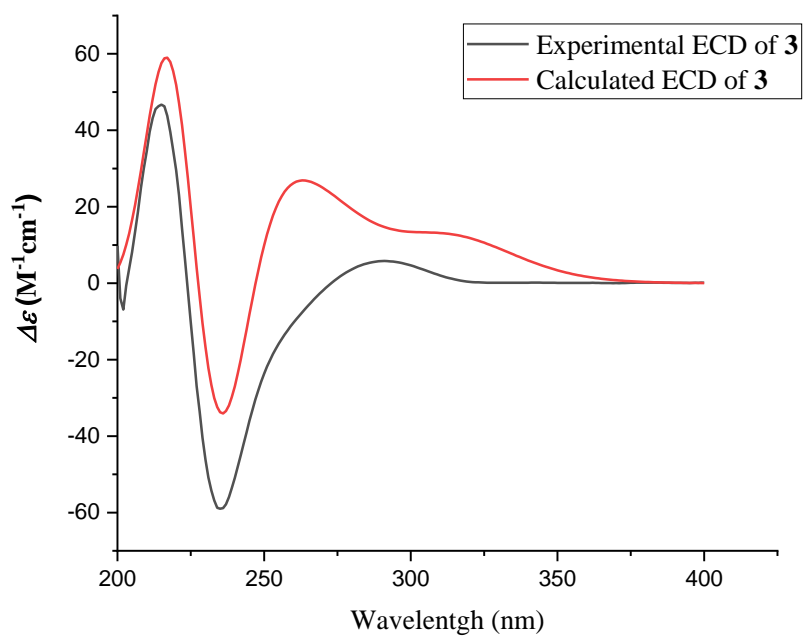

**Figure S7.** Experimental and calculated ECD spectra for compound 3.

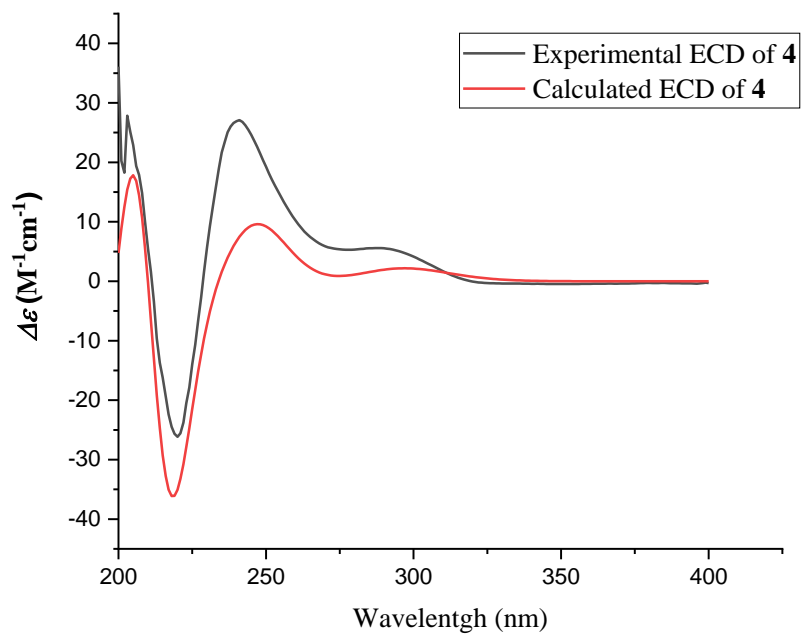

**Figure S8.** Experimental and calculated ECD spectra for compound 4.
